# Supplementary material
Source: PubMed Central journal article supplement (PMC7384739)
Supplement: cs0c01487_si_001.pdf [file cs0c01487_si_001.pdf]

# Supporting information

## *In vivo* Selection for Formate Dehydrogenases with High Efficiency and Specificity towards NADP<sup>+</sup>

Liliana Calzadiaz-Ramirez <sup>1‡</sup>, Carla Calvó-Tusell <sup>2‡</sup>, Gabriele M. M. Stoffel <sup>3‡</sup>, Steffen N. Lindner <sup>1</sup>,  
Sílvia Osuna <sup>2,4</sup>, Tobias J. Erb <sup>3,5</sup>, Marc Garcia-Borràs <sup>2\*</sup>, Arren Bar-Even <sup>1\*</sup>, Carlos G. Acevedo-Rocha <sup>6\*</sup>

<sup>1</sup> Max Planck Institute of Molecular Plant Physiology, Am Mühlenberg 1, D-14476 Potsdam-Golm, Germany

<sup>2</sup> Institut de Química Computacional i Catàlisi and Departament de Química, Universitat de Girona, Carrer Maria Aurèlia Capmany 69, Girona 17003, Catalonia, Spain

<sup>3</sup> Max Planck Institute of Terrestrial Microbiology, Karl-von-Frisch-Str. 10, D-35043 Marburg, Germany

<sup>4</sup> ICREA, Pg. Lluís Companys 23, 08010 Barcelona, Spain

<sup>5</sup> LOEWE Research Center for Synthetic Microbiology (SYNMIKRO), Karl-von-Frisch-Str. 16, D-35043 Marburg, Germany

<sup>6</sup> Biosyntia ApS, 2100 Copenhagen, Denmark

‡ These authors contributed equally to this study.

\* Corresponding authors: marcgbq@gmail.com (MGB), Bar-Even@mpimp-golm.mpg.de (ABE), car@biosyntia.com (CGAR)

## Table of contents

|                                                                                                                                                                   |           |
|-------------------------------------------------------------------------------------------------------------------------------------------------------------------|-----------|
| <b>1. Supporting results</b> .....                                                                                                                                | <b>3</b>  |
| Figure S1. Overview of PseFDH enzyme.....                                                                                                                         | 3         |
| Figure S2. Comparison of the active site conformational dynamics of WT PseFDH in the presence of NAD <sup>+</sup> or NADP <sup>+</sup> cofactor and formate. .... | 4         |
| Figure S3. CRS-SALAD results.....                                                                                                                                 | 5         |
| Figure S4. Grouping of activity-recovering residues.....                                                                                                          | 6         |
| Figure S5. CASTER results for PseFDH library. ....                                                                                                                | 7         |
| Figure S6. QQC of PseFDH library. ....                                                                                                                            | 8         |
| Figure S7. SDS-PAGE of purified PseFDH mutants. ....                                                                                                              | 8         |
| Figure S8. MD simulations analysis with focus on mutation D221Q. ....                                                                                             | 9         |
| Figure S9. MD simulations analysis focused on residue R222 conformational dynamics and interactions. ....                                                         | 10        |
| Figure S10. MD simulations analysis with focus on mutation H379K.....                                                                                             | 11        |
| Figure S11. MD simulations analysis with focus on mutation C255A.....                                                                                             | 12        |
| Figure S12. MD simulations analysis with focus on mutation S380V.....                                                                                             | 13        |
| Figure S13. QM studies and conformational population analysis based on QM-derived geometric criteria.....                                                         | 14        |
| Figure S14. Comparison of the selected structures with the holo-MorFDH (PDB:2GSD).....                                                                            | 15        |
| Figure S15. Comparison of structures of PseFDH holo 2GUG with the reference structure of holo MorFDH structure 2GSD. ....                                         | 15        |
| Figure S16. Michaelis Menten curves for selected PseFDH variants.....                                                                                             | 19        |
| Figure S17. Michaelis Menten curves for deconvoluted PseFDH variants.....                                                                                         | 23        |
| Table S1. Kinetic parameters of NADP <sup>+</sup> -dependent FDHs previously reported.....                                                                        | 24        |
| Table S2. Kinetics of PseFDH variants. ....                                                                                                                       | 25        |
| Table S3. Kinetics of PseFDH V9 deconvoluted variants.....                                                                                                        | 26        |
| Table S4. Designed oligos by DNAworks to construct the 685 bp fragment for the combinatorial library.....                                                         | 27        |
| Table S5. Oligos designed for PseFDH specific mutations.....                                                                                                      | 28        |
| <b>2. Protocols</b> .....                                                                                                                                         | <b>29</b> |
| Computational models.....                                                                                                                                         | 29        |
| QuikChange protocol.....                                                                                                                                          | 30        |
| ADO fragment synthesis.....                                                                                                                                       | 30        |
| <b>3. References</b> .....                                                                                                                                        | <b>32</b> |

## 1. Supporting results

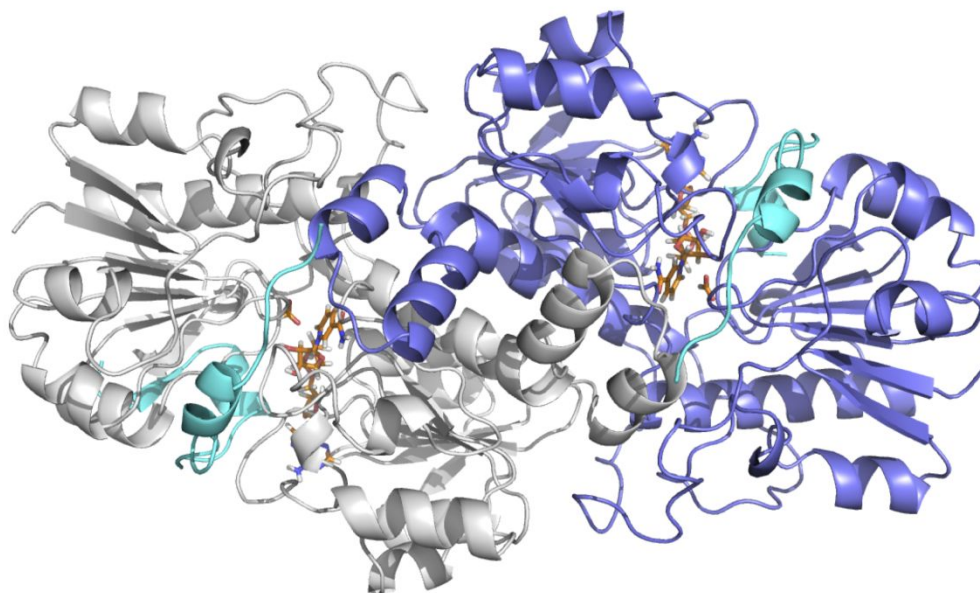

**Figure S1.** Overview of PseFDH enzyme.

The enzyme is a homodimeric complex formed by two non-covalently bound subunits (one subunit shown in grey and the other in purple). The X-Ray structure used as starting point for our MD simulations is based on PDBs 2GO1 <sup>1</sup> for the *apo* state and 2GUG <sup>2</sup> for the *holo* state. In these X-Ray structures, the cofactor NAD<sup>+</sup> and the important loop found in a region near cofactor binding (residues 375-400 depicted in cyan), were unsolved. This loop was reconstructed based on FDH X-ray structure PDB: 2NAD <sup>3</sup> (see computational details).

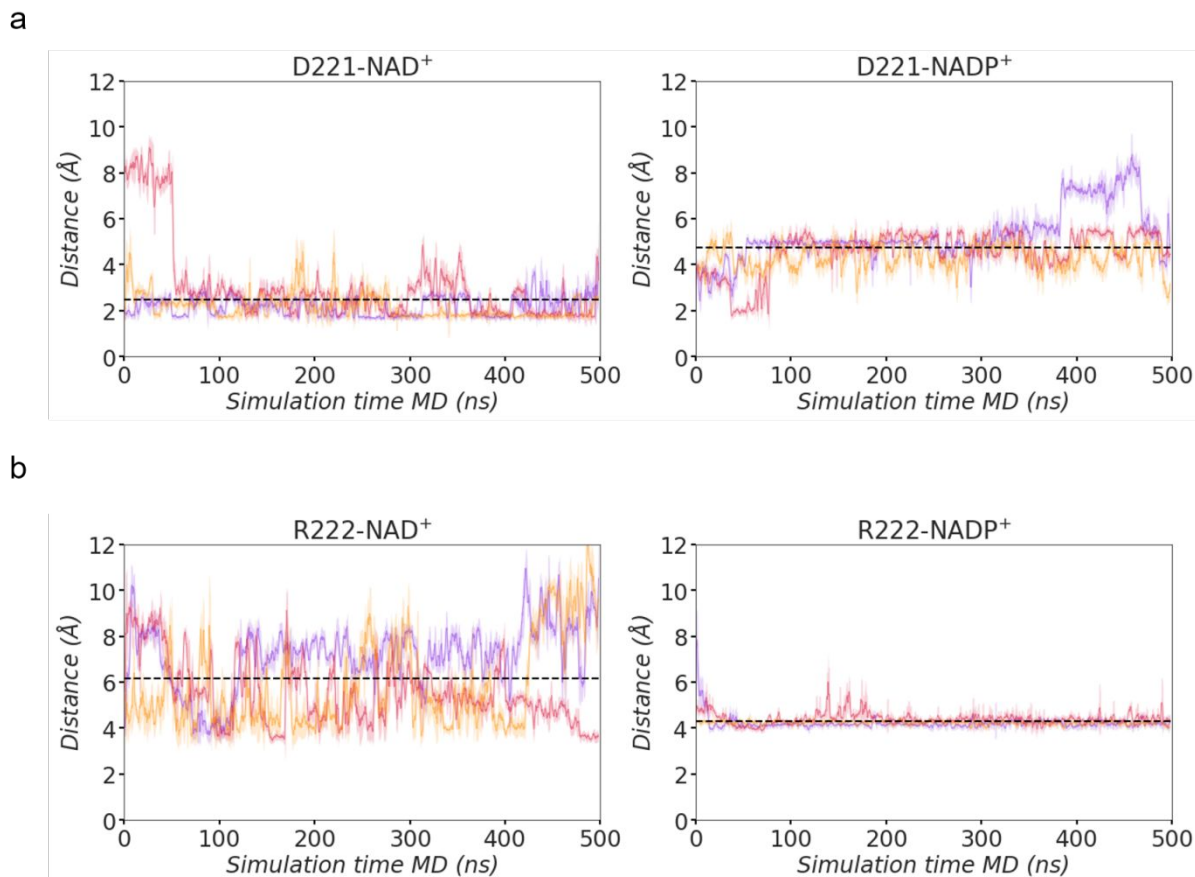

**Figure S2.** Comparison of the active site conformational dynamics of WT PseFDH in the presence of NAD<sup>+</sup> or NADP<sup>+</sup> cofactor and formate.

a) Plot of the distance between the carbon of the carboxylate group of D221 and 2'-OH group of NAD<sup>+</sup> (left) and the distance between the carbon of the carboxylate group of D221 and NADP<sup>+</sup> 2'- phosphate group (right) along 3 representative 500 ns replicas of MD simulations (shown in red, orange, and purple) for both WT-NAD<sup>+</sup> and WT-NADP<sup>+</sup> systems. Average distances from all replicas of  $2.5 \pm 1.2$  Å and  $4.7 \pm 1.0$  Å, respectively, are also shown with a dashed black line; and b) Plot of the distance between the carbon of the guanidinium group of R222 and 2'-OH group of NAD<sup>+</sup> (left) and the distance between the carbon of the guanidinium group of R222 and NADP<sup>+</sup> 2'- phosphate group (right) along 3 representative 500 ns replicas of MD simulations for both WT-NAD<sup>+</sup> and WT-NADP<sup>+</sup> systems. Average distances (dashed black line) of  $6.2 \pm 1.9$  Å and  $4.3 \pm 0.4$  Å, respectively, are also shown. All distances are represented in Å.

| Purpose              | Residue         | Degenerate codon            | AA alphabet |
|----------------------|-----------------|-----------------------------|-------------|
| Cofactor-specificity | D221            | RNC                         | ADGINSTV    |
|                      | R222            | CNA                         | LPQR        |
|                      | H223            | MVC                         | HNPRST      |
| Activity recovery    | Medium priority | Site-saturation mutagenesis |             |
|                      | H258            |                             |             |
|                      | E260            |                             |             |
|                      | T261            |                             |             |
|                      | S380            |                             |             |
|                      | Low priority    |                             |             |
|                      | H379            |                             |             |

  

**Figure S3.** CRS-SALAD results.

Left: The by CRS-SALD server predicted mutagenesis of 3 active site residues (D221, R222 and H223) based on a library of 192 variants (8 x 4 x 6), followed by mutagenesis at 5 other residues to recover activity <sup>4</sup>. Right: The 8 residues were mapped on the PseFDH monomer highlighting the residues suggested by mutagenesis for switching cofactor specificity (green) and for recovering activity (blue) The carbon (yellow), nitrogen (blue) and oxygen (red) atoms of the cofactor are shown in stick format. Picture generated with PyMol using PDB file 2NAD <sup>3</sup>.

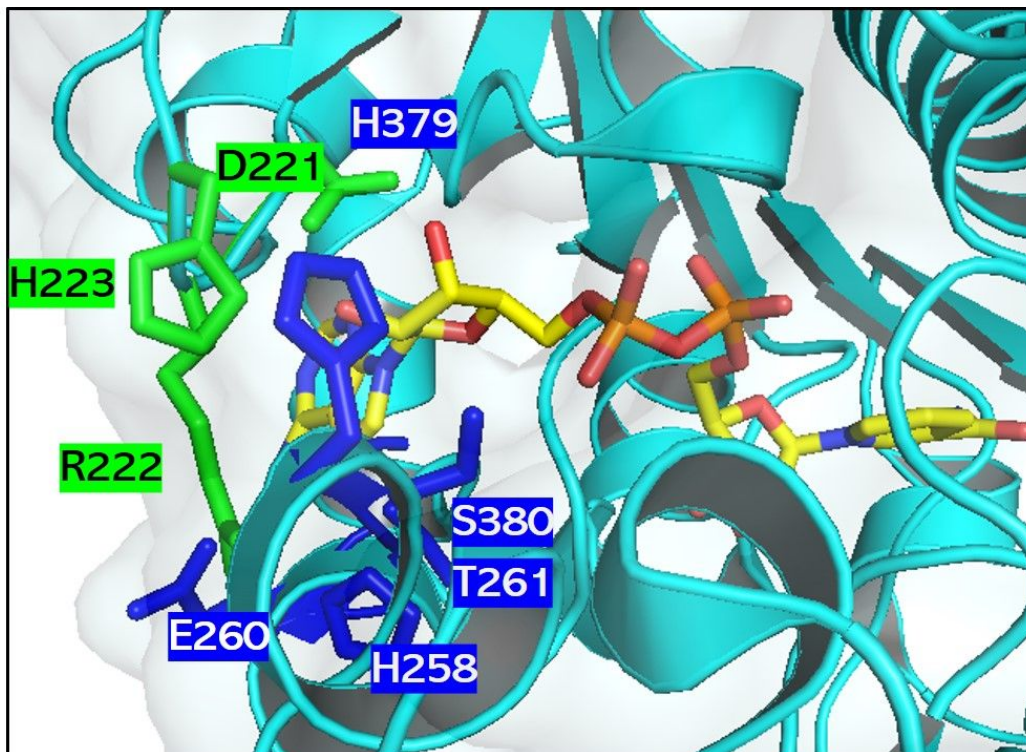

**Figure S4.** Grouping of activity-recovering residues.

Groups A (H379 and S380) and B (H258, E260, T261) residues (blue) were formed according to their proximity to selectivity residues D221, R222 and H223 (green). Residues D221 and H223 are closer to residue H379, which is adjacent to residue S380, whereas residue R222, which was not considered for mutagenesis in this study, lies among residues H258, E260 and T261. The carbon (yellow), nitrogen (blue) and oxygen (red) atoms of the cofactor are shown in stick format. Picture generated with PyMol using PDB file 2NAD<sup>3</sup>.

|    | A                                                                                                                                                                                                                                                                                                                                                   | B             | C               | D | E | F                                                | G  | H  | I  | J  | K |
|----|-----------------------------------------------------------------------------------------------------------------------------------------------------------------------------------------------------------------------------------------------------------------------------------------------------------------------------------------------------|---------------|-----------------|---|---|--------------------------------------------------|----|----|----|----|---|
| 1  | <b>I. SIMULTANEOUS RANDOMIZATION OF DIFFERENT POSITIONS USING DIFFERENT DEGENERATE CODONS</b>                                                                                                                                                                                                                                                       |               |                 |   |   |                                                  |    |    |    |    |   |
| 2  | Position 1                                                                                                                                                                                                                                                                                                                                          | N             | N               | K |   | <b>Amino acids [AA] encoded in each position</b> |    |    |    |    |   |
| 3  | Position 2                                                                                                                                                                                                                                                                                                                                          | N             | N               | K |   |                                                  | 1  | 2  | 3  | 4  | 5 |
| 4  | Position 3                                                                                                                                                                                                                                                                                                                                          | D             | B               | W |   | Ala [A]                                          | 2  | 2  | 2  | 2  | 1 |
| 5  | Position 4                                                                                                                                                                                                                                                                                                                                          | N             | N               | K |   | Arg [R]                                          | 3  | 3  | 1  | 3  | 0 |
| 6  | Position 5                                                                                                                                                                                                                                                                                                                                          | R             | B               | T |   | Asn [N]                                          | 1  | 1  | 0  | 1  | 0 |
| 7  |                                                                                                                                                                                                                                                                                                                                                     |               |                 |   |   | Asp [D]                                          | 1  | 1  | 0  | 1  | 0 |
| 8  | <b>II. SET % COVERAGE</b>                                                                                                                                                                                                                                                                                                                           |               | 95              |   |   | Cys [C]                                          | 1  | 1  | 1  | 1  | 0 |
| 9  | <b>and % WT background</b>                                                                                                                                                                                                                                                                                                                          |               | 0               |   |   | Gln [Q]                                          | 1  | 1  | 0  | 1  | 0 |
| 10 | <b>Positions Randomized</b>                                                                                                                                                                                                                                                                                                                         | <b>Codons</b> | <b>Colonies</b> |   |   | Glu [E]                                          | 1  | 1  | 0  | 1  | 0 |
| 11 | 1                                                                                                                                                                                                                                                                                                                                                   |               |                 |   |   | Gly [G]                                          | 2  | 2  | 2  | 2  | 1 |
| 12 | 1 + 2                                                                                                                                                                                                                                                                                                                                               |               |                 |   |   | His [H]                                          | 1  | 1  | 0  | 1  | 0 |
| 13 | 1 + 2 + 3                                                                                                                                                                                                                                                                                                                                           |               |                 |   |   | Ile [I]                                          | 1  | 1  | 2  | 1  | 1 |
| 14 | 1 + 2 + 3 + 4                                                                                                                                                                                                                                                                                                                                       |               |                 |   |   | Leu [L]                                          | 3  | 3  | 1  | 3  | 0 |
| 15 | 1 + 2 + 3 + 4 + 5                                                                                                                                                                                                                                                                                                                                   | 3538944       | 10601727        |   |   | Lys [K]                                          | 1  | 1  | 0  | 1  | 0 |
| 16 |                                                                                                                                                                                                                                                                                                                                                     |               |                 |   |   | Met [M]                                          | 1  | 1  | 0  | 1  | 0 |
| 17 |                                                                                                                                                                                                                                                                                                                                                     |               |                 |   |   | Phe [F]                                          | 1  | 1  | 1  | 1  | 0 |
| 18 | <b>IMPORTANT:</b> When different positions are randomized simultaneously it is important to select in each position a degeneracy that contains the correspondent wild-type aminoacid, otherwise the evaluation of the possible effects of the individual libraries would not be properly analyzed, as one of the positions is forced to be mutated. |               |                 |   |   |                                                  |    |    |    |    |   |
| 19 | The creation of libraries randomizing more than one codon using "mutation forced" degeneracies is as well interesting as the diversity generated differs strongly to the wild-type amino acid sequence.                                                                                                                                             |               |                 |   |   |                                                  |    |    |    |    |   |
| 20 |                                                                                                                                                                                                                                                                                                                                                     |               |                 |   |   | Pro [P]                                          | 2  | 2  | 0  | 2  | 0 |
| 21 |                                                                                                                                                                                                                                                                                                                                                     |               |                 |   |   | Ser [S]                                          | 3  | 3  | 3  | 3  | 1 |
| 22 |                                                                                                                                                                                                                                                                                                                                                     |               |                 |   |   | Thr [T]                                          | 2  | 2  | 2  | 2  | 1 |
| 23 |                                                                                                                                                                                                                                                                                                                                                     |               |                 |   |   | Trp [W]                                          | 1  | 1  | 0  | 1  | 0 |
| 24 |                                                                                                                                                                                                                                                                                                                                                     |               |                 |   |   | Tyr [Y]                                          | 1  | 1  | 0  | 1  | 0 |
| 25 |                                                                                                                                                                                                                                                                                                                                                     |               |                 |   |   | Val [V]                                          | 2  | 2  | 2  | 2  | 1 |
| 26 |                                                                                                                                                                                                                                                                                                                                                     |               |                 |   |   | Stop                                             | 1  | 1  | 1  | 1  | 0 |
|    |                                                                                                                                                                                                                                                                                                                                                     |               |                 |   |   | Codons                                           | 32 | 32 | 18 | 32 | 6 |
|    |                                                                                                                                                                                                                                                                                                                                                     |               |                 |   |   | AA                                               | 20 | 20 | 10 | 20 | 6 |

**Figure S5.** CASTER results for PseFDH library.

This program allows calculating the library sizes at both DNA and amino acid level for up to 5 residues as well as different library coverage percentages.

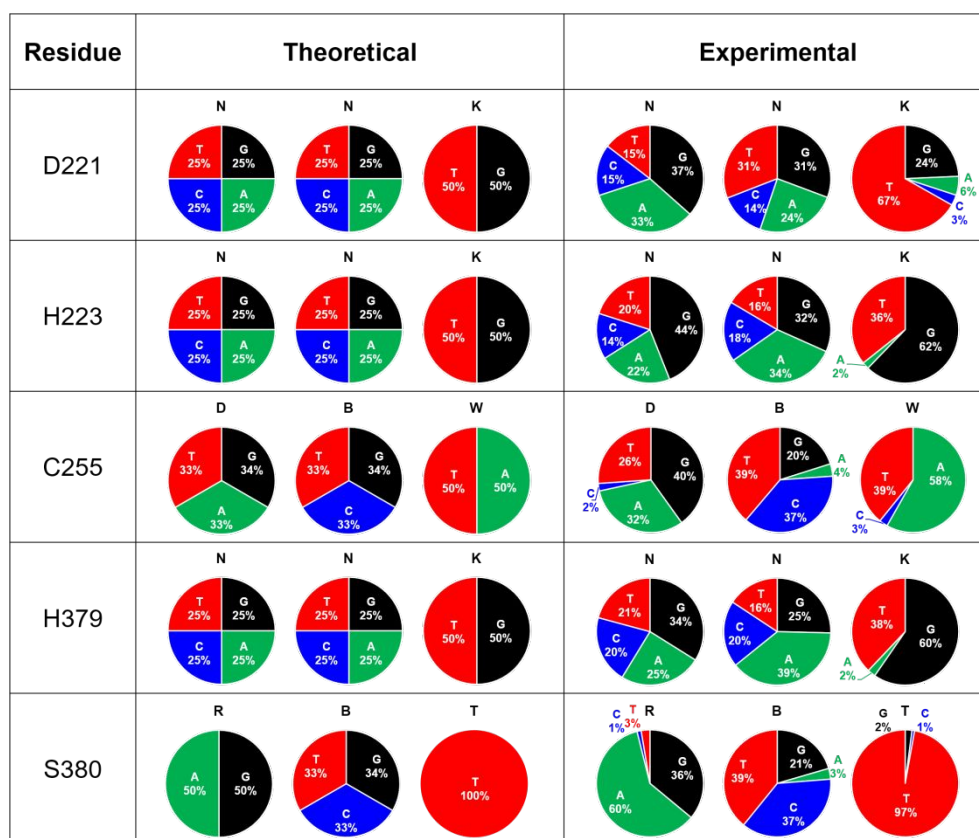

**Figure S6.** QQC of PseFDH library.

Pie charts representing the percentage of each base at each position of residues D221, H223, C255, H379 and S380.

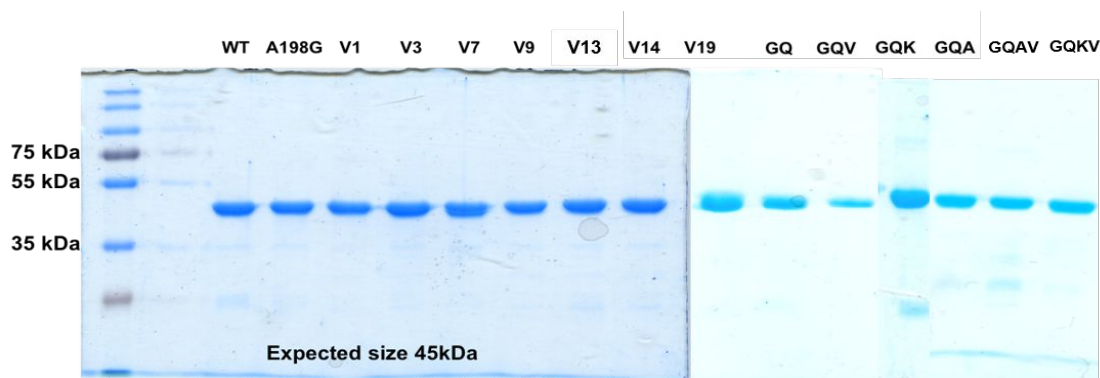

**Figure S7.** SDS-PAGE of purified PseFDH mutants.

About 3 mg of purified protein were loaded in each well of a 12.5% polyacrylamide gel. Left: Protein bands for the WT and 7 variants isolated from the selection experiment. Right: Proteins bands for the deconvoluted mutants GQ (A198G/D221Q), GQV (A198G/D221Q/S380V), GQK (A198G/D221Q/H379K), GQA (A198G/D221Q/C255A), GQAV (A198G/D221Q/C255A/S380V) and GQKV (A198G/D221Q/H379K/S380V).



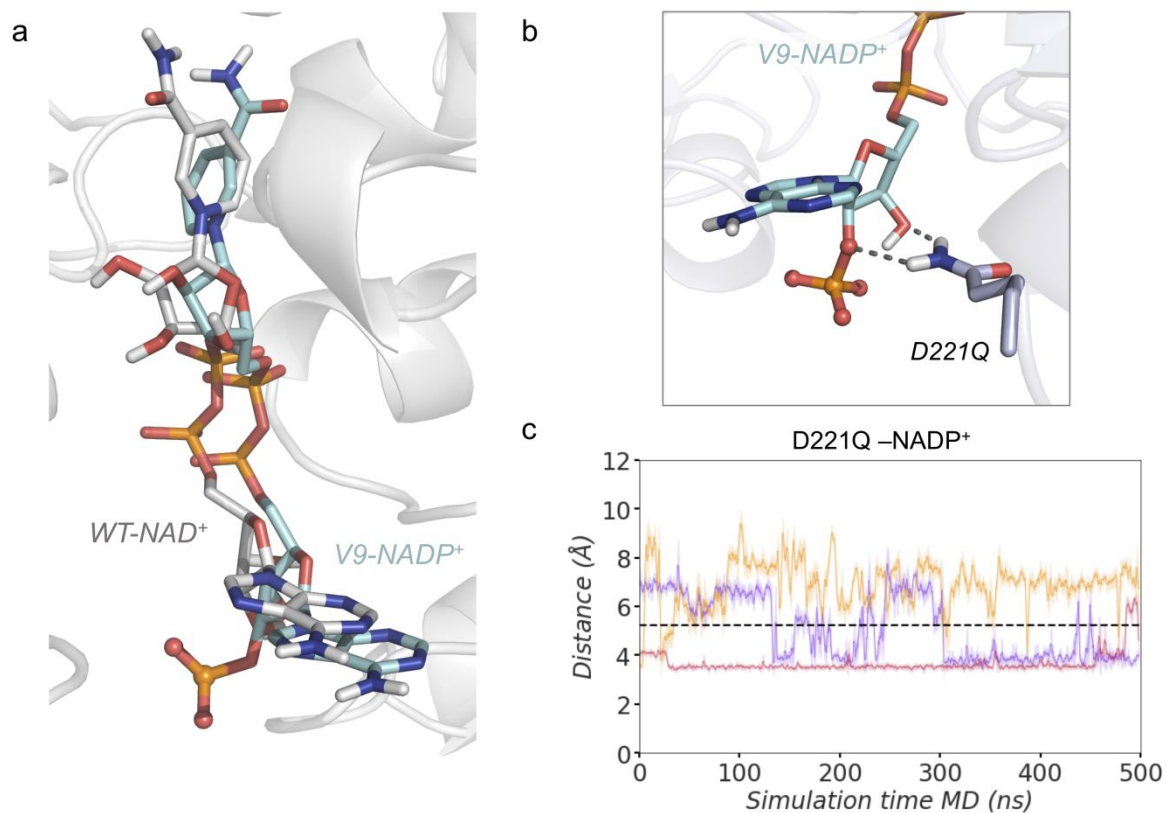

**Figure S8.** MD simulations analysis with focus on mutation D221Q.

a) Overlay of PseFDH WT-NAD<sup>+</sup> (grey) and variant V9-NADP<sup>+</sup> (cyan) representative conformations of the binding pocket. The figure shows that the adenine ring of both WT-NAD<sup>+</sup> and V9-NADP<sup>+</sup> are found in the same orientation. However, the nicotinamide ring of the V9-NADP<sup>+</sup> is rotated with respect to WT-NAD<sup>+</sup>. The Root-Mean-Square-Deviation (RMSD) of the cofactor NADP<sup>+</sup> in the variant V9 with respect to the natural NAD<sup>+</sup> cofactor in the WT enzyme is 2.1 Å. b) Representative structure of the frequently observed hydrogen bonds established between D221Q and the 2'-phosphate and 3'-OH group of NADP<sup>+</sup>. c) Plot of the distance of the hydrogen bond established between D221Q and the 2'-phosphate and 3'-OH group of NADP<sup>+</sup> along 3 replicas of 500 ns of MD simulations for the V9-NADP<sup>+</sup> (replicas are shown in purple, orange and red). Average distance from all replicas (dashed black line) of  $5.2 \pm 1.7$  Å is also depicted. All distances are represented in Å.

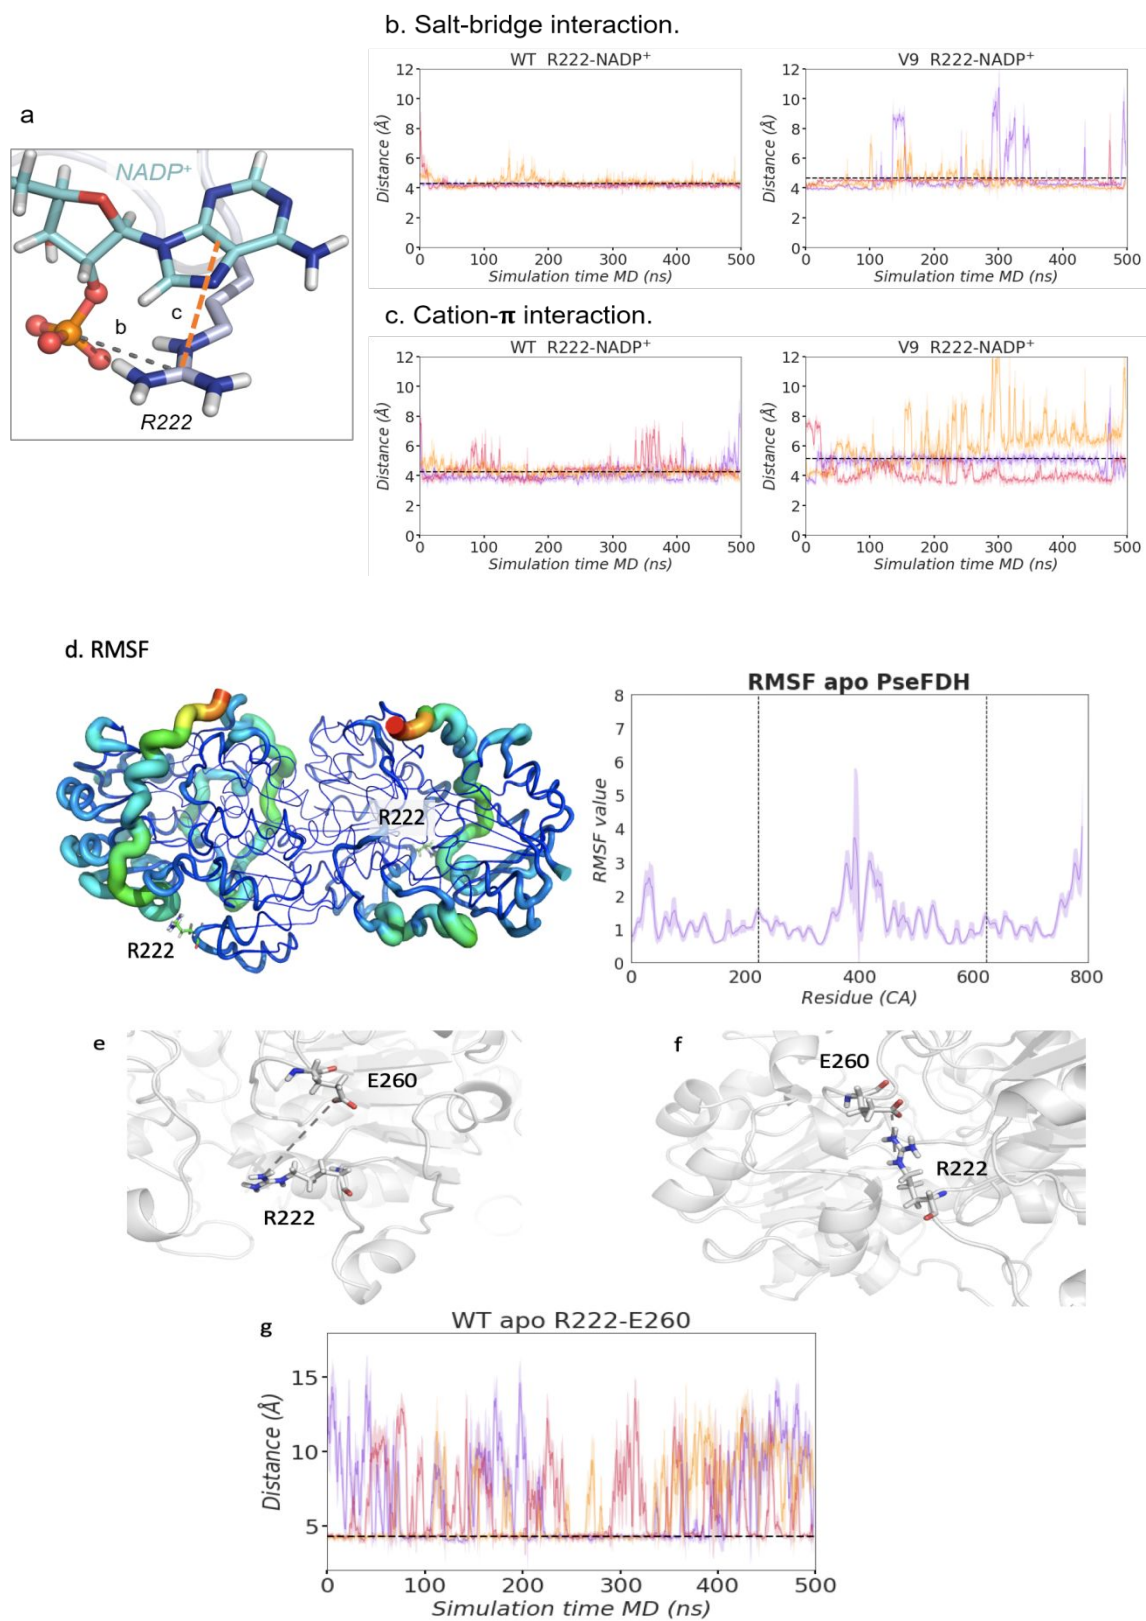

**Figure S9.** MD simulations analysis focused on residue R222 conformational dynamics and interactions.

a) Representative structure of V9-NADP<sup>+</sup> binding pocket with the salt-bridge interaction between the guanidinium group of R222 and the 2'-phosphate group of NADP<sup>+</sup> and the cation- $\pi$  between the guanidinium group of R222 and the adenine group of NADP<sup>+</sup> highlighted. b) Plot of the distance of the salt-bridge interaction between the carbon of the guanidinium group of R222 and the 2'-phosphate group of NADP<sup>+</sup> along 3 replicas of 500 ns of MD simulations for the WT-NADP<sup>+</sup> and the V9-NADP<sup>+</sup> (red, orange and purple lines). Average distances (dashed black line) of  $4.3 \pm 0.4$  Å and  $4.4 \pm 1.2$  Å, respectively, are also included. c) Plot of the distance of the cation- $\pi$  interaction between the guanidinium group of R222 and the center of mass of the adenine group of NADP<sup>+</sup> along 3 replicas of 500 ns of MD simulations for the WT-NADP<sup>+</sup> and the V9-NADP<sup>+</sup>. Average distances (dashed black line) of  $4.3 \pm 0.7$  Å and  $5.2 \pm 1.4$  Å, respectively, are also shown. d) Root-Mean-Square-Fluctuation (RMSF) analysis of alpha carbons of apo state PseFDH computed from 3 replicas of 500 ns of MD simulations. e) Solvent exposed conformation of R222 side chain in apo PseFDH explored along MD simulations. f) Interaction between R222 and E260 apo PseFDH observed in MD simulations. g) Plot of the distance between the carbon of the guanidinium group of R222 and the carbon of the carboxylic group of E260 along 3 replicas of 500 ns of MD simulations for the apo state of PseFDH enzyme. All distances are represented in Å.

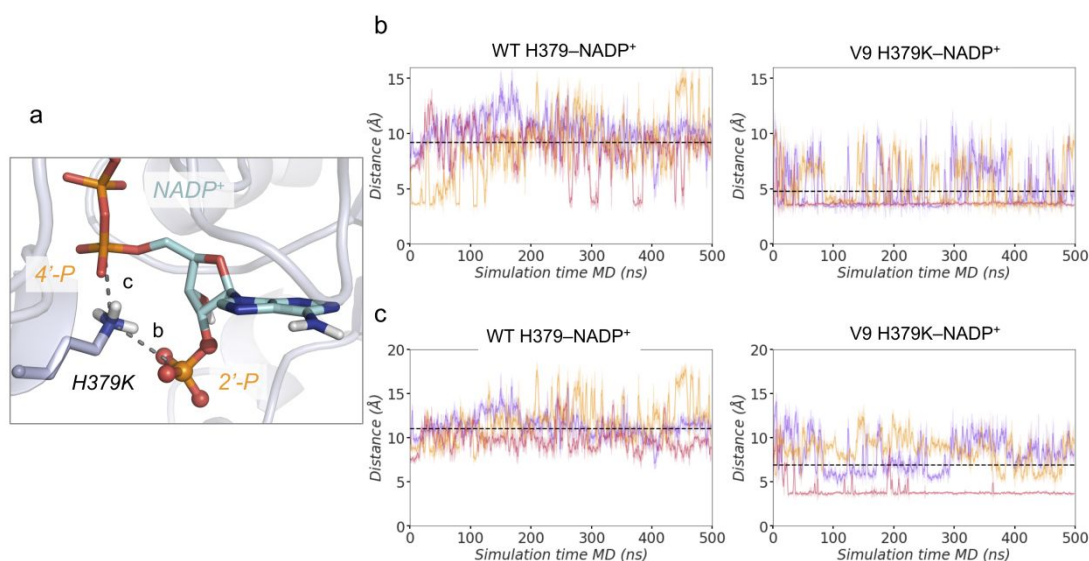

**Figure S10.** MD simulations analysis with focus on mutation H379K.

a) Representative structure of V9-NADP<sup>+</sup> binding pocket with the salt-bridge interaction between the positively charged amino group of H379K and the 2'-phosphate group of NADP<sup>+</sup> and the salt-bridge interaction between the positively charged amino group of H379K and the linker 4'-phosphate group of NADP<sup>+</sup> highlighted. b) Plot of the distance between the  $\epsilon$ -nitrogen of H379 and the 2'-phosphate group of NADP<sup>+</sup> along 3 replicas of 500 ns of MD simulations (shown in red, orange and purple) for the WT-NADP<sup>+</sup> (left) and plot of the distance of the salt-bridge interaction between the positively charged amino group of H379K and the 2'-phosphate group of NADP<sup>+</sup> along 3 replicas of 500 ns of MD simulations for the V9-NADP<sup>+</sup> (right). Average distances from all replicas (dashed black line) of  $9.2 \pm 2.5$  Å and  $4.8 \pm 2.0$  Å, respectively, are additionally included. c) Plot of the distance between the  $\epsilon$ -nitrogen of H379 and the linker 4'-phosphate group of NADP<sup>+</sup> along 3 replicas of 500 ns of MD simulations for the WT-NADP<sup>+</sup> (left) and plot of the distance of the salt-bridge interaction between the positively charged amino group of H379K and the linker 4'-phosphate group of NADP<sup>+</sup> along 3 replicas of 500 ns of MD simulations for the V9-NADP<sup>+</sup> (right). Average distances (dashed black line) of  $11.0 \pm 1.2$  Å and  $6.9 \pm 2.7$  Å, respectively, are also shown. All distances are represented in Å.

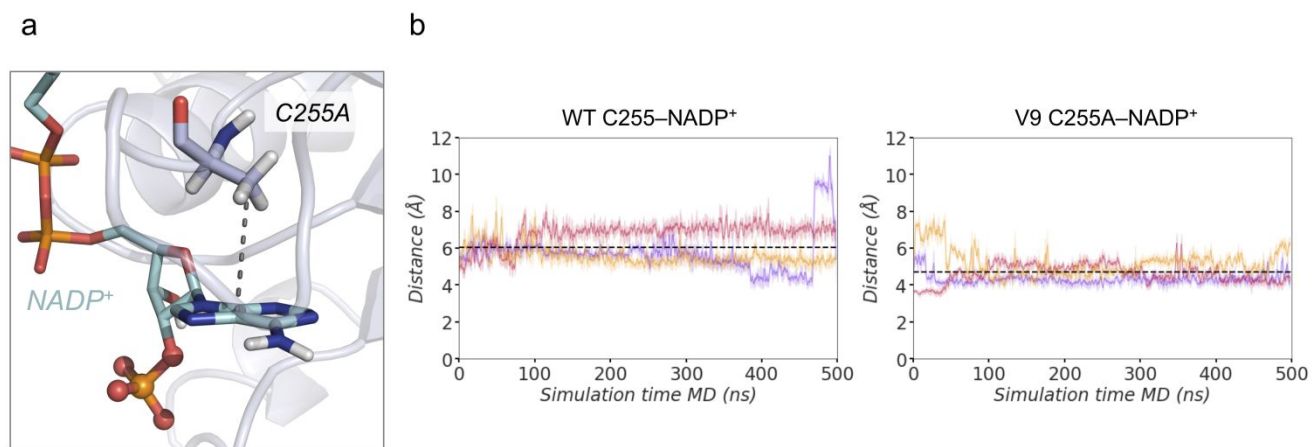

**Figure S11.** MD simulations analysis with focus on mutation C255A.

a) Representative structures of WT-NADP<sup>+</sup> (left) and V9-NADP<sup>+</sup> (right) binding pocket with the CH $\cdots\pi$  interaction between the adenine ring of NADP<sup>+</sup> and the  $\beta$ -carbon of the side chain of C255 in the case of WT (left) and the  $\beta$ -carbon of the side chain of C255A in the case of V9 (right) highlighted. b) Plot of the distance between the center of mass (COM) of the NADP<sup>+</sup> adenine ring and the  $\beta$ -carbon of the side chain of C255 in the case of WT (left) and the  $\beta$ -carbon of the side chain of C255A in the case of V9 (right) along 3 replicas of 500 ns of MD simulations (shown in red, orange, and purple) for the WT-NADP<sup>+</sup> and the V9-NADP<sup>+</sup>. Average distances from all replicas of  $6.0\pm 1.0$  Å and  $4.7\pm 0.7$  Å, respectively, are also shown with a dashed black line. All distances are represented in Å.

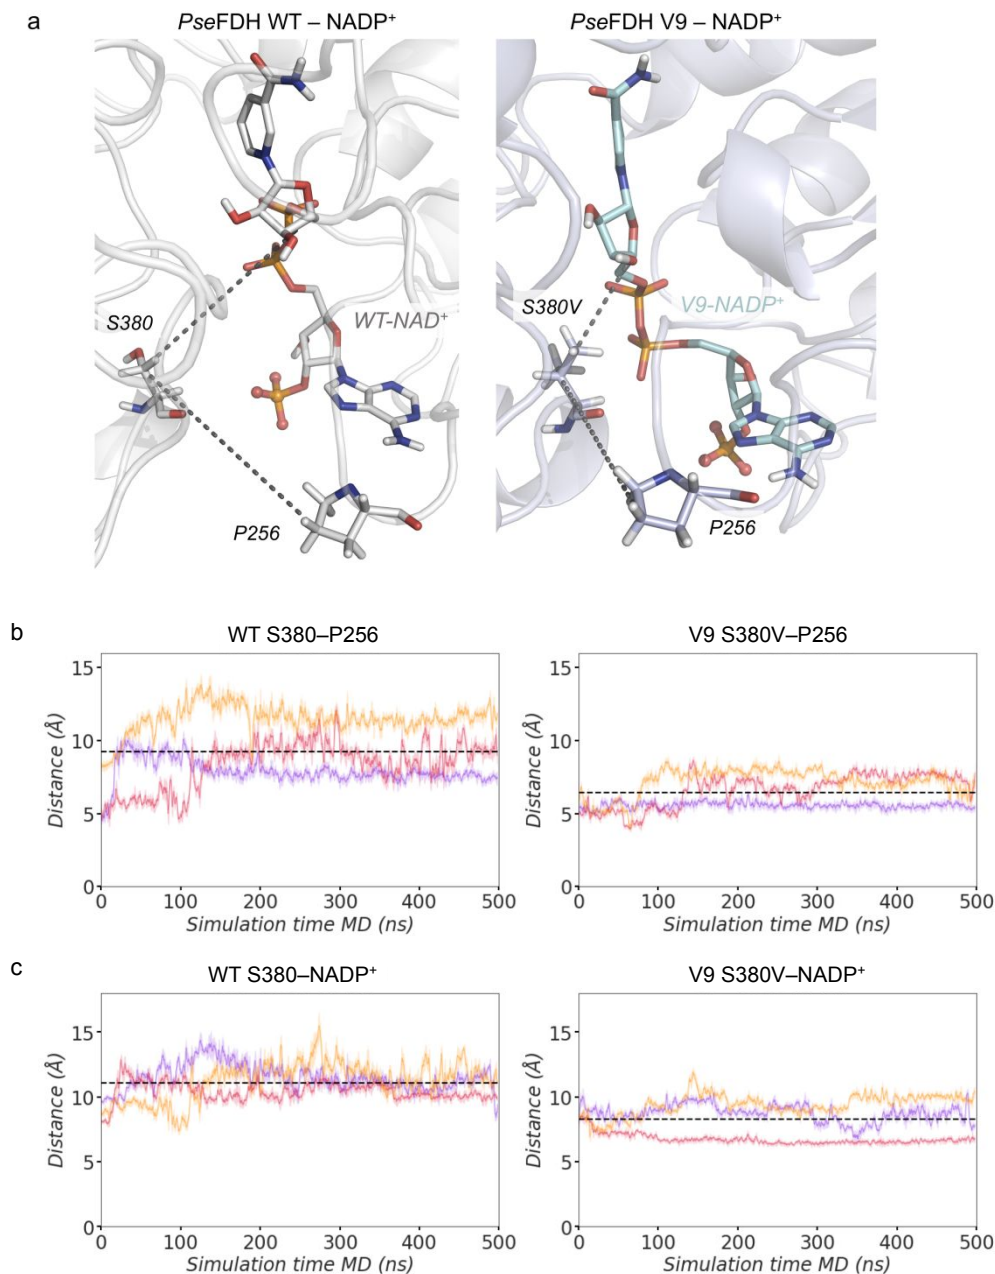

**Figure S12.** MD simulations analysis with focus on mutation S380V.

a) Representative structures of WT-NADP<sup>+</sup> (left) and V9-NADP<sup>+</sup> (right) binding pocket with the interactions between the β-carbon of the side chain of S380(WT)/V380(V9) and the β-carbon of the side chain of P256 and the interactions between the β-carbon of the side chain of S380(WT)/V380(V9) and the nicotinamide ribose group of NADP<sup>+</sup> highlighted. b) Plot of the distance between the β-carbon of the side chain of S380(WT)/V380(V9) and the β-carbon of the side chain of P256 along 3 replicas of 500 ns of MD simulations for the WT-NADP<sup>+</sup> and the V9-NADP<sup>+</sup>. Average distances from all replicas (dashed black line) of 9.2 ± 2.1 Å and 6.5 ± 1.1 Å, respectively, are also included. c) Plot of the distance between the β-carbon of the side chain of S380(WT)/V380(V9) and the nicotinamide ribose group of NADP<sup>+</sup> along 3 replicas of 500 ns of MD simulations for the WT-NADP<sup>+</sup> and the V9-NADP<sup>+</sup>. Average distances of 11.1 ± 1.3 Å and 8.3 ± 1.4 Å, respectively, are shown with a dashed black line. All distances are represented in Å.

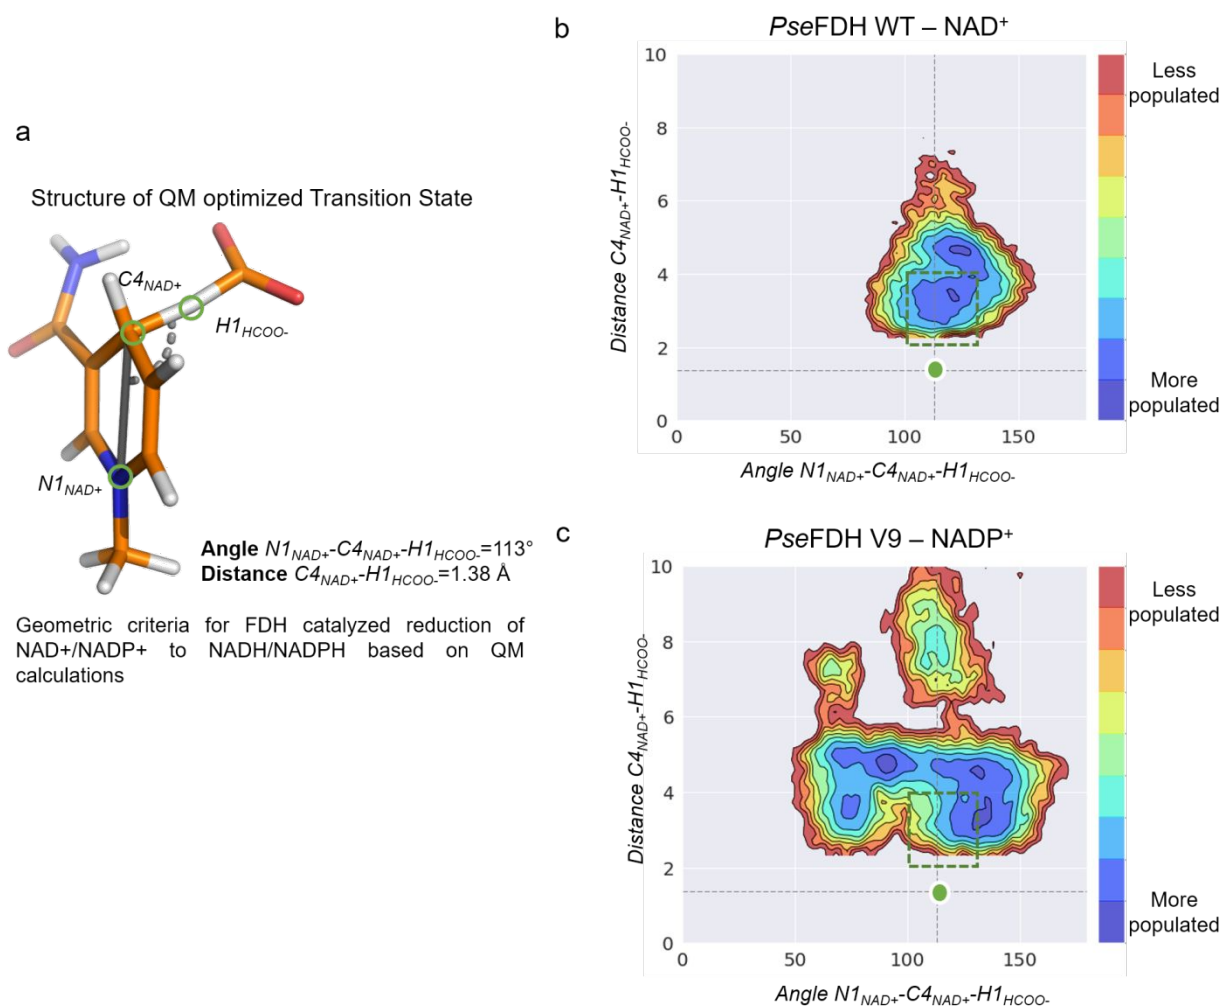

**Figure S13.** QM studies and conformational population analysis based on QM-derived geometric criteria.

a) Structure of the QM optimized Transition State for PseFDH catalyzed reduction of  $NAD^+/NADP^+$  with the optimal angle and distance for hydride transfer reaction. A truncated computational model of the cofactor was used in the TS calculations (see computational details). b) Conformational population analysis based on the geometric criteria (hydride transfer distance versus angle) for PseFDH hydride transfer in the case of WT- $NAD^+$ . c) Conformational population analysis based on the geometric criteria (hydride transfer distance versus angle) for PseFDH hydride transfer in the case of V9- $NADP^+$ . The plots have been constructed using the angle  $N1_{NAD^+/NADP^+}-C4_{NAD^+/NADP^+}-H1_{HCOO^-}$  and the distance  $C4_{NAD^+/NADP^+}-H1_{HCOO^-}$  sampled along 3 replicas of 500 ns MD simulations for WT- $NAD^+$  and V9- $NADP^+$ . The catalytic distance (1.38 Å, represented by a horizontal dashed black line; value obtained from QM calculation) and the proper angle (ca. 113°, represented by a vertical dashed black line; value obtained from QM calculation) required for hydride transfer is represented by a green dot. The range of distances and angles considered as catalytically relevant in our MD simulations are those found within the green box (distances that range from 2 to 4 Å and angles from 100° to 130°).

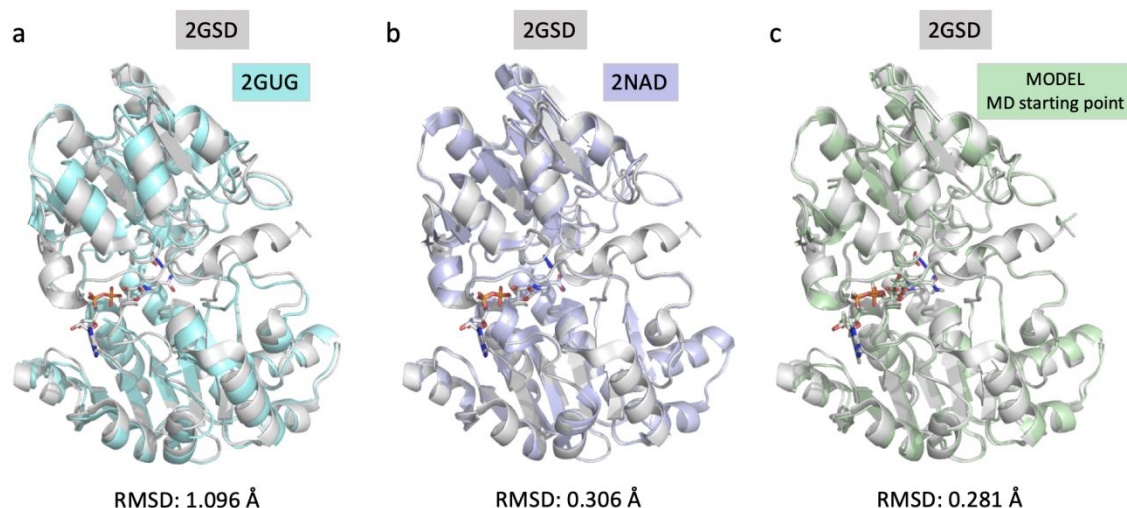

**Figure S14.** Comparison of the selected structures with the holo-MorFDH (PDB:2GSD).

Comparison of structures of PseFDH holo 2GUG (cyan), ternary complex 2NAD (purple) and the constructed model for the ternary complex (green) with the reference structure of holo MorFDH structure 2GSD (grey). Root-Mean-Square-Deviation (RMSD) values (in Å) considering all the atoms are depicted in the figure using the PDB 2GSD as a reference. Only one monomer is shown.

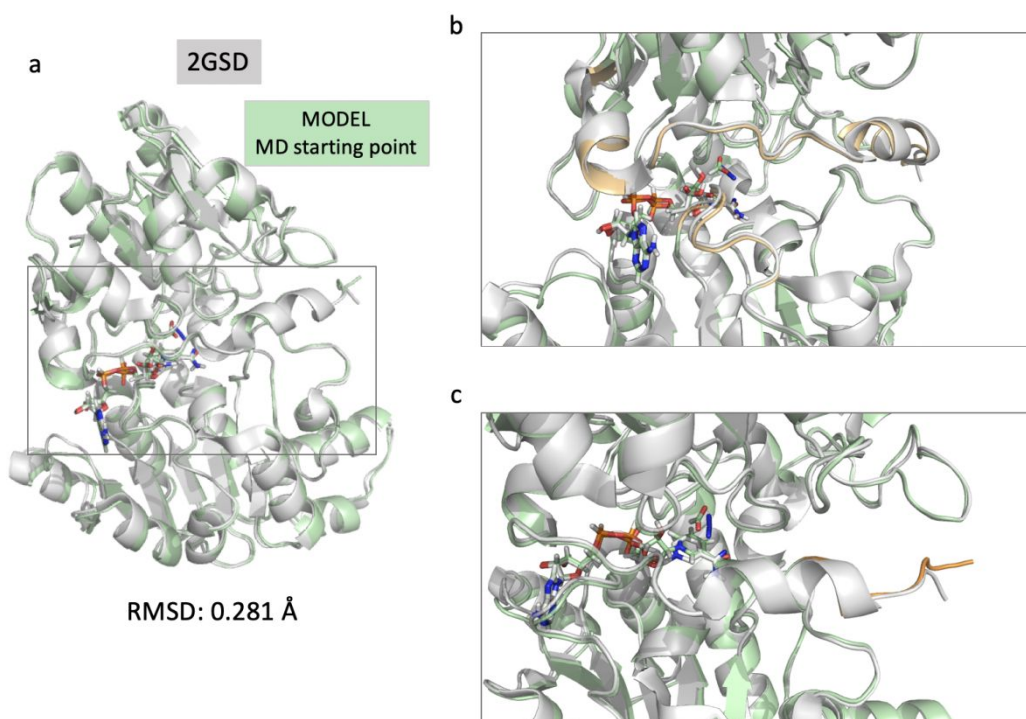

**Figure S15.** Comparison of structures of PseFDH holo 2GUG with the reference structure of holo MorFDH structure 2GSD.

a) Comparison of structure of the constructed model for the ternary complex (green) with the reference structure of holo MorFDH structure 2GSD (grey). b) Unsolved regions that were reconstructed with homology modelling tools are shown in orange. c) Residues 393-400 that were not present in the reference 2NAD structure were present in the final model used as starting point for MD simulations. The 7 extra residues are depicted in orange.

WT

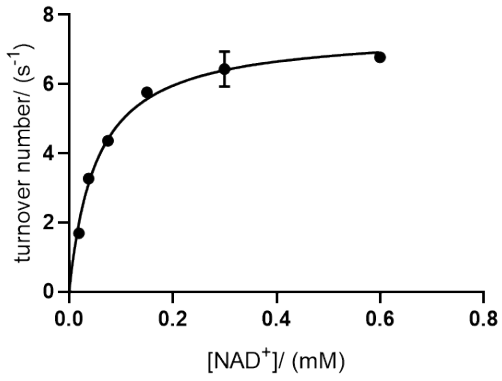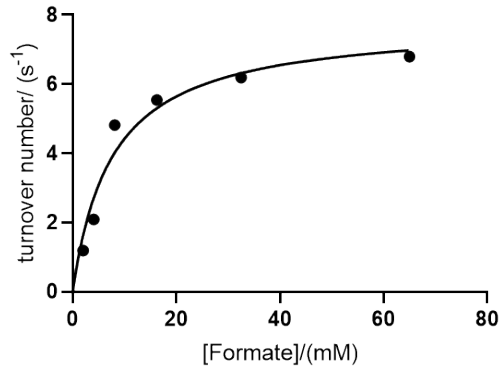

V1

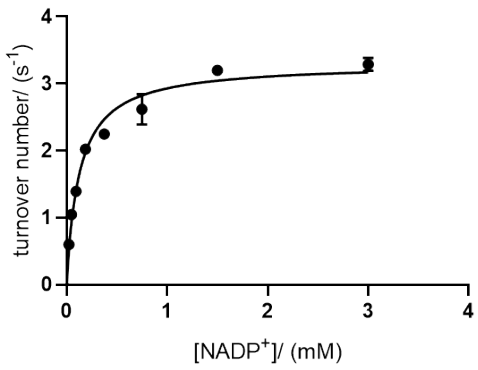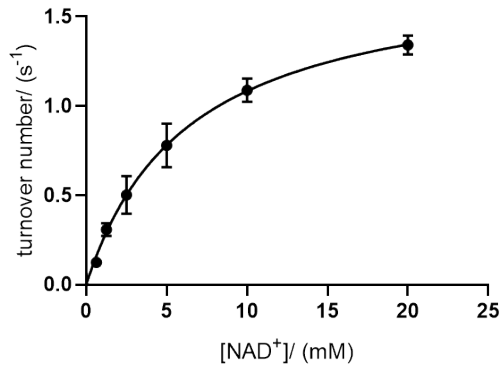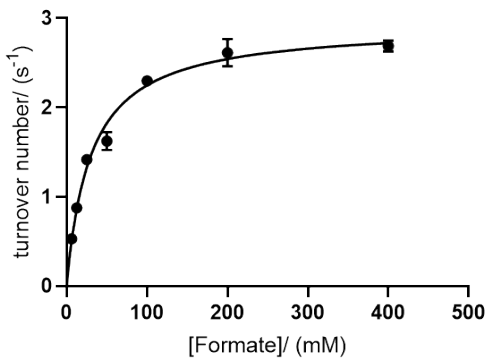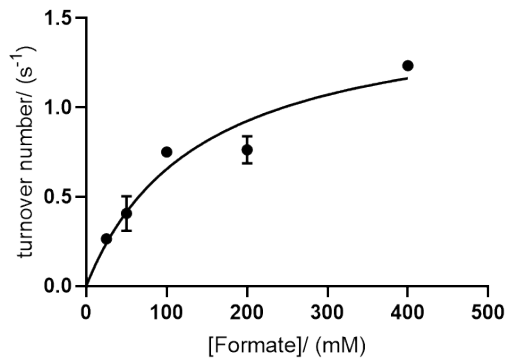



**V3**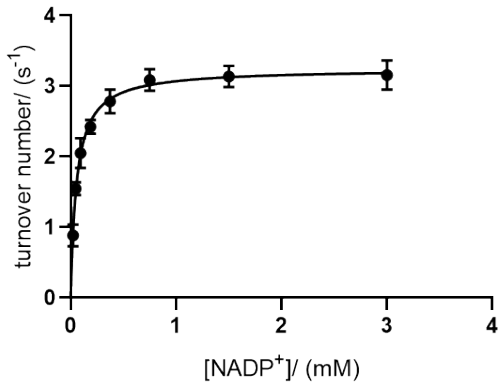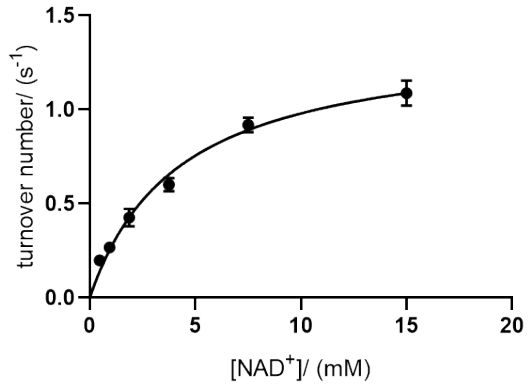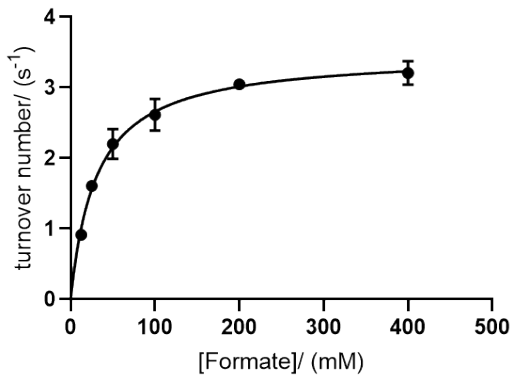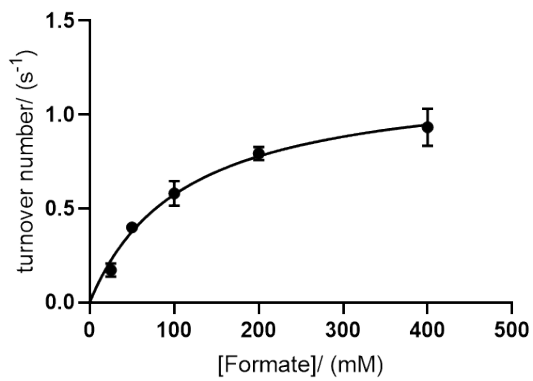**V7**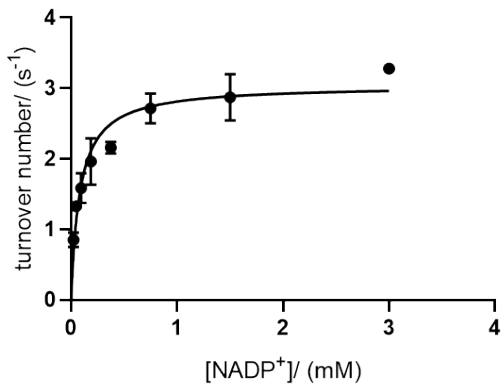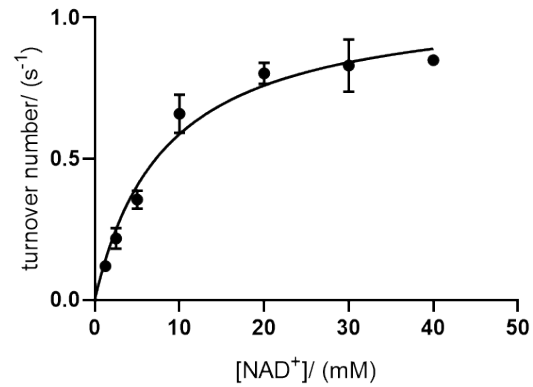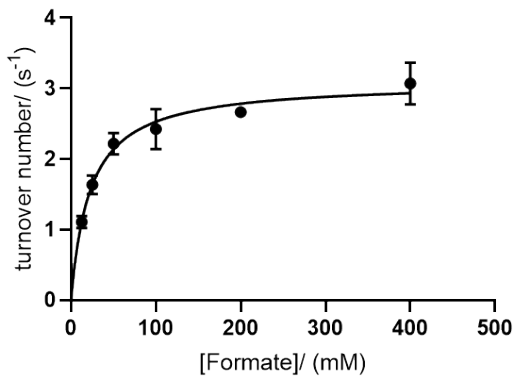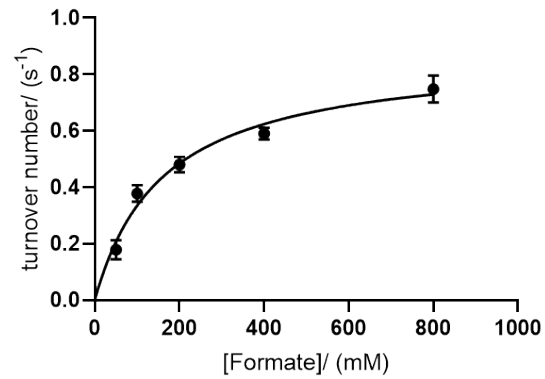

V9

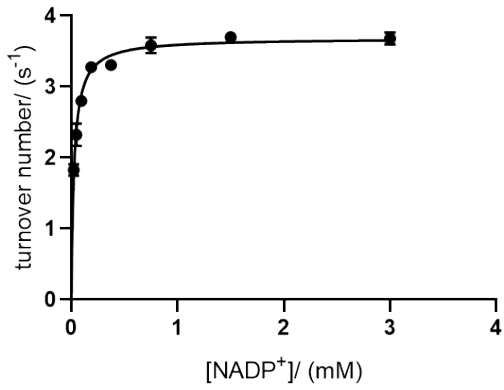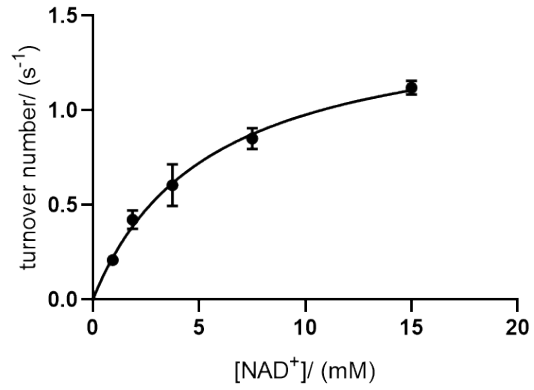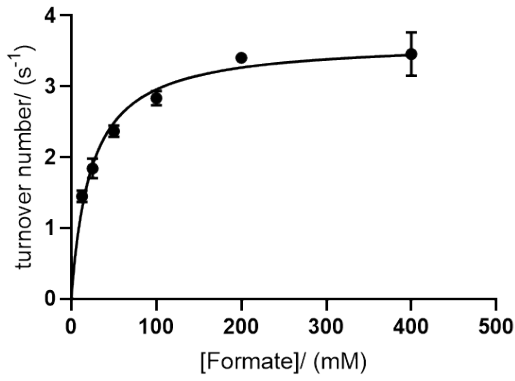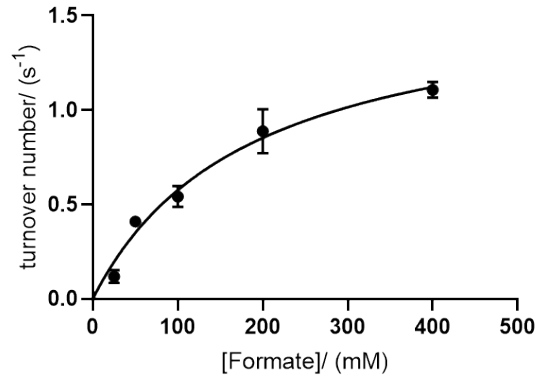

V13

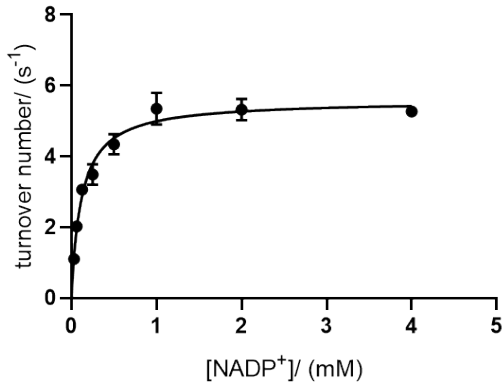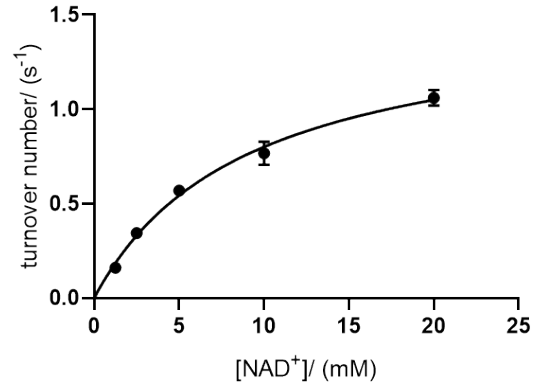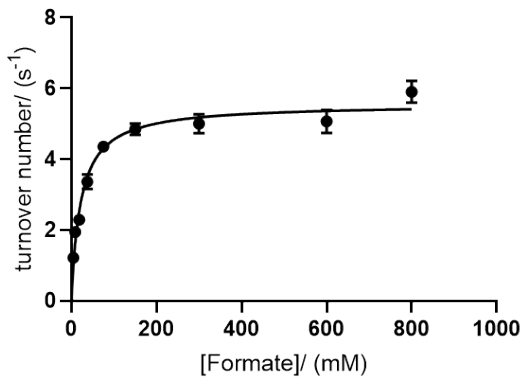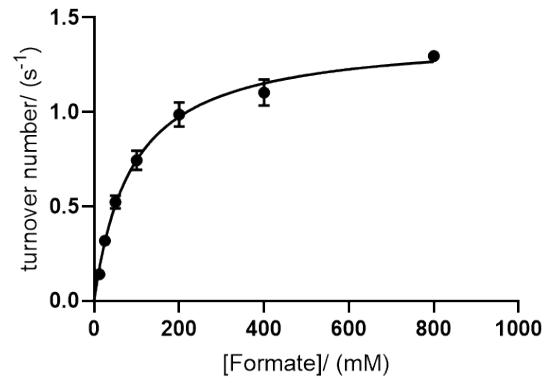

V14

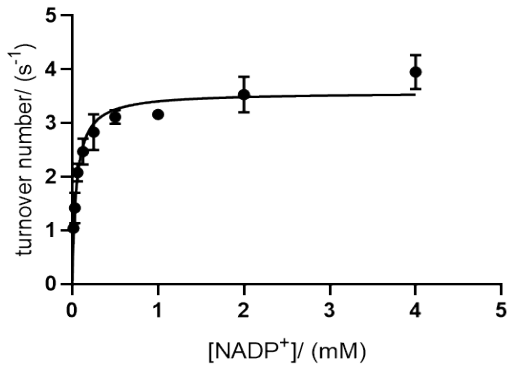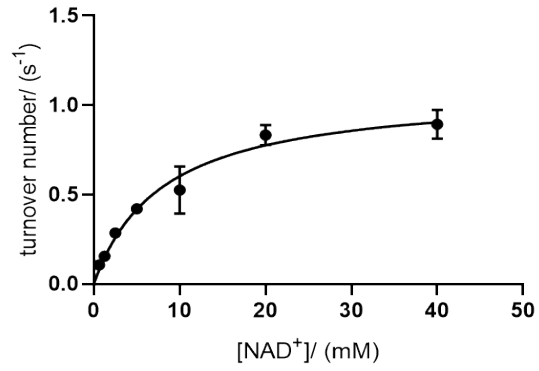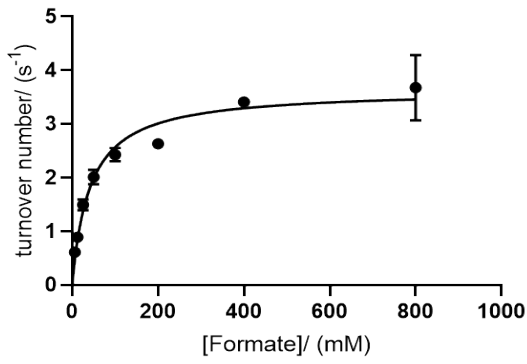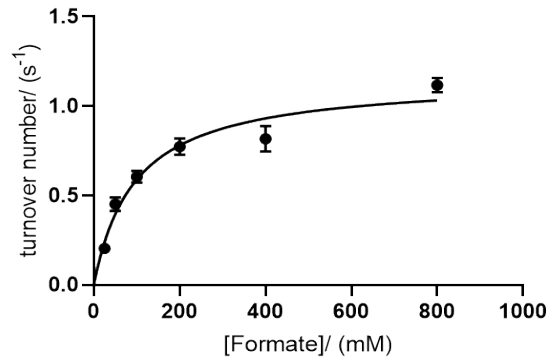

V19

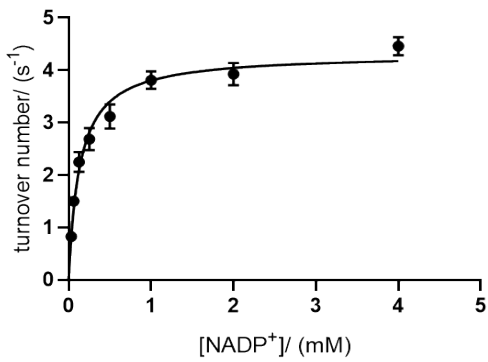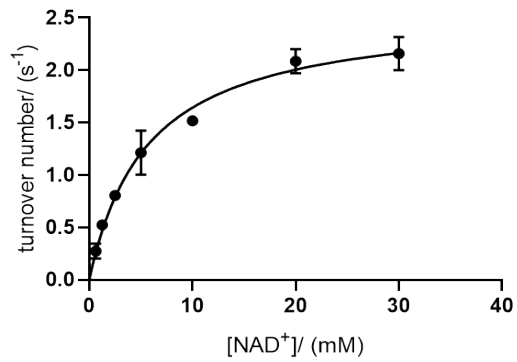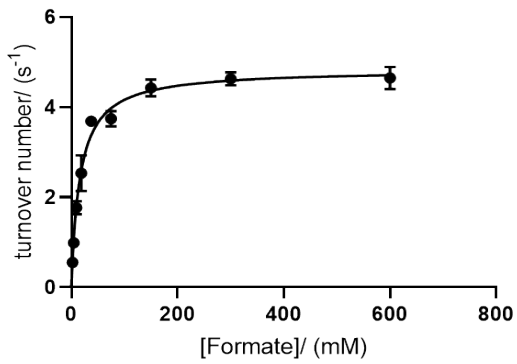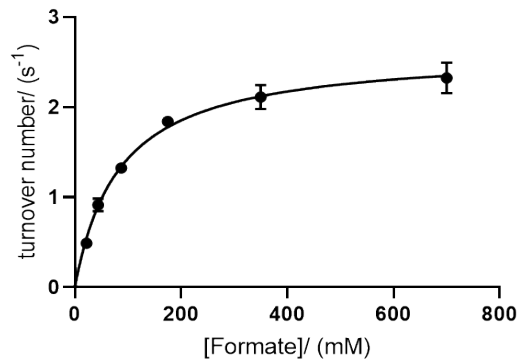

Figure S16. Michaelis Menten curves for selected PseFDH variants.

### Variant G (A198G)

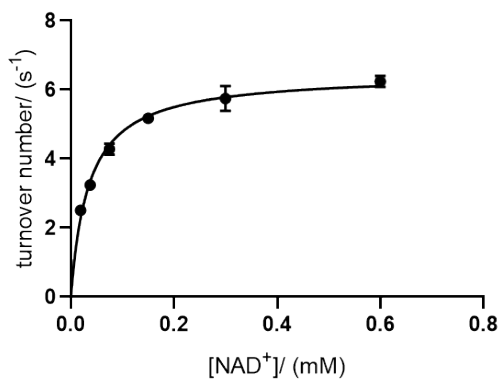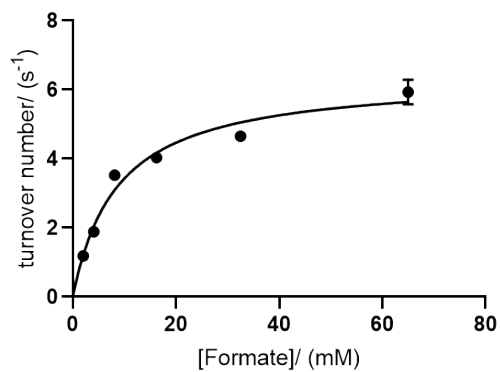

### Variant GQ (A198G/D221Q)

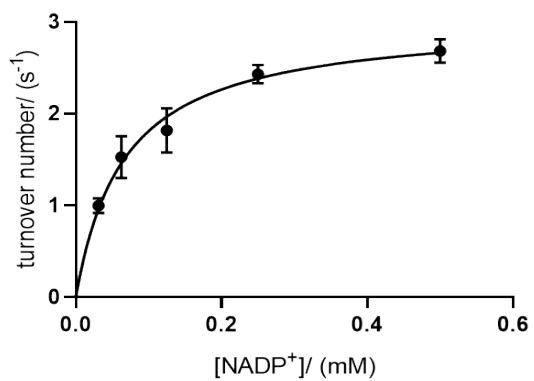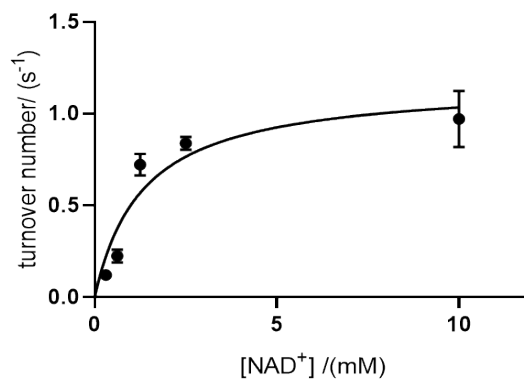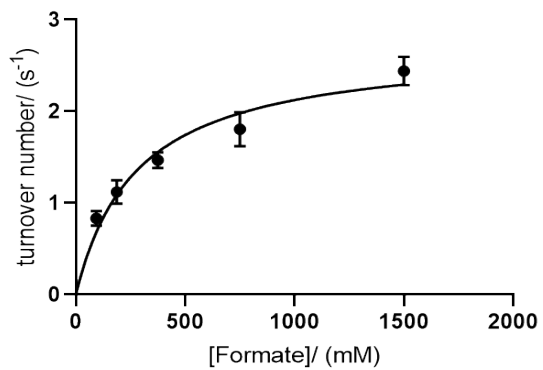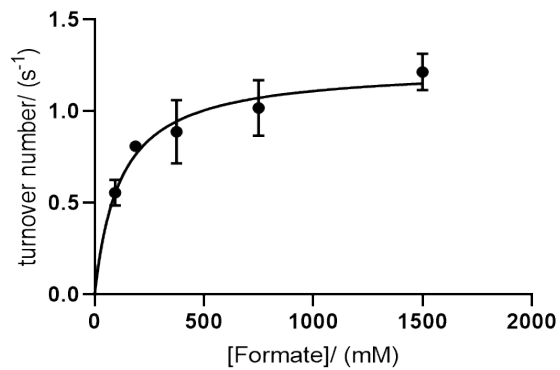

### Variant GQA (A198G/ D221Q/C255A)

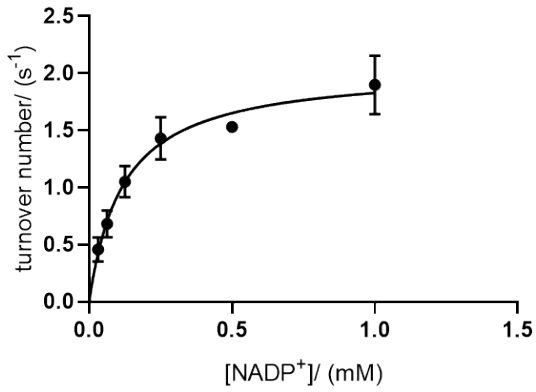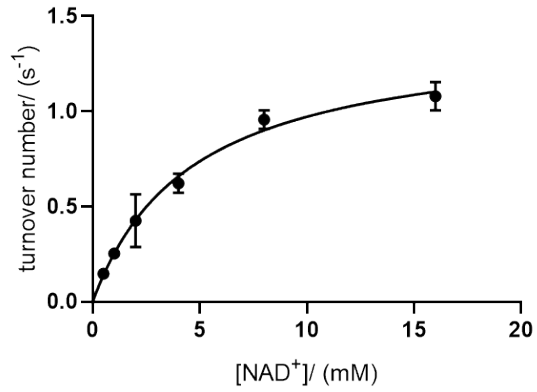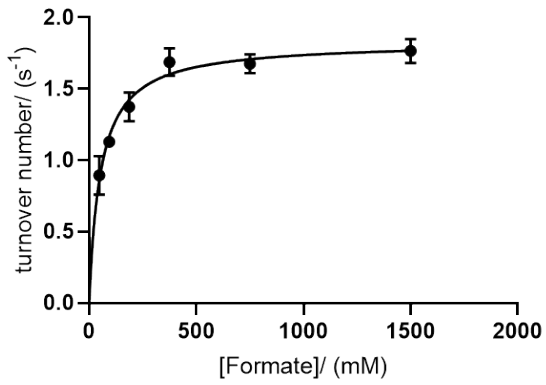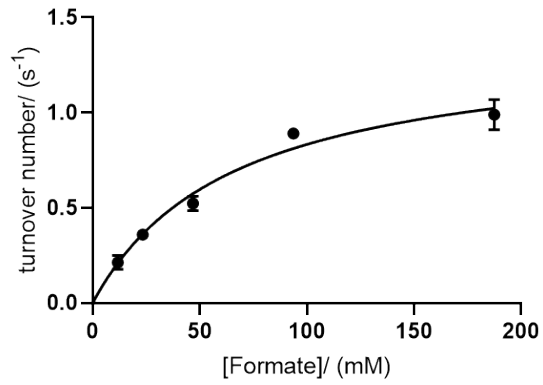

### Variant GQK (A198G/ D221Q/H379K)

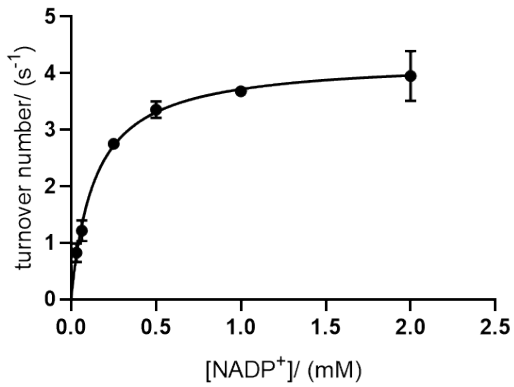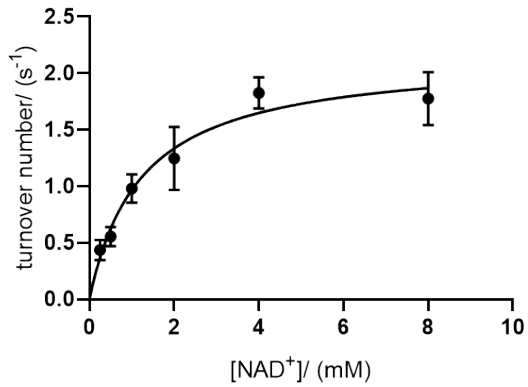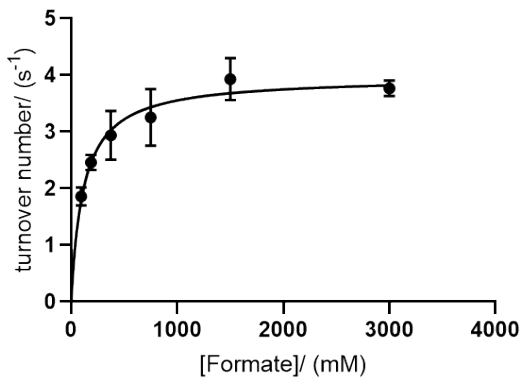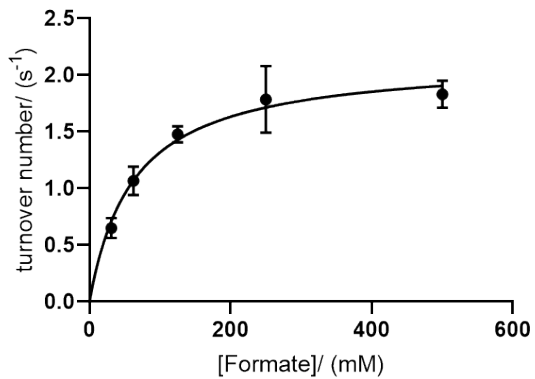

**Variant GQV (A198G/ D221Q/S380V)**

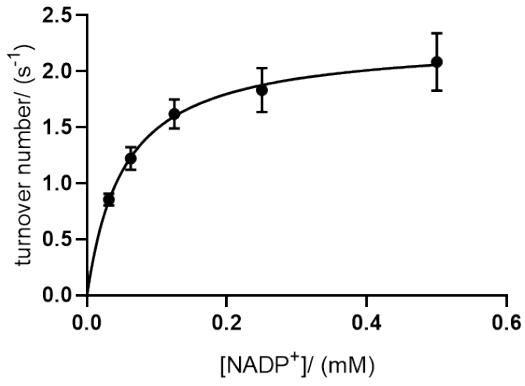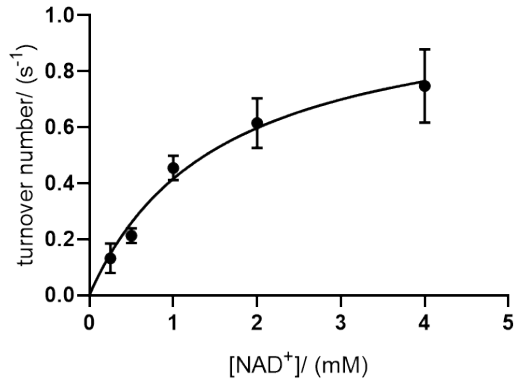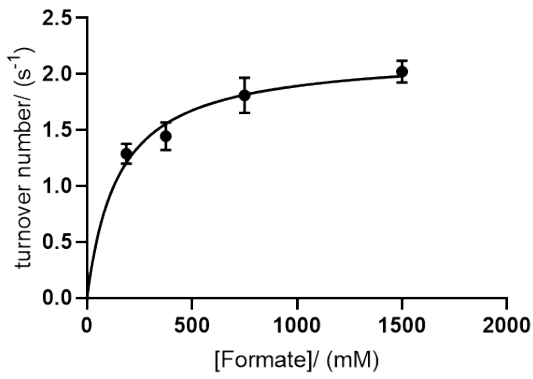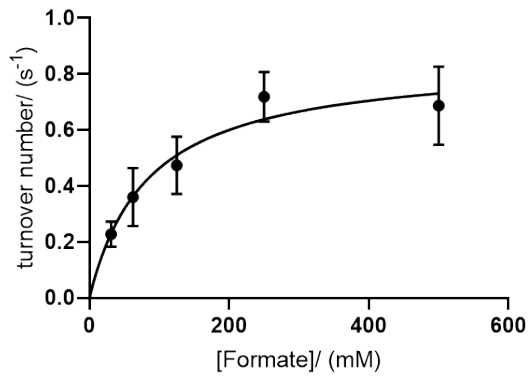

**Variant GQKV (A198G/D221Q/H379K/S380V)**

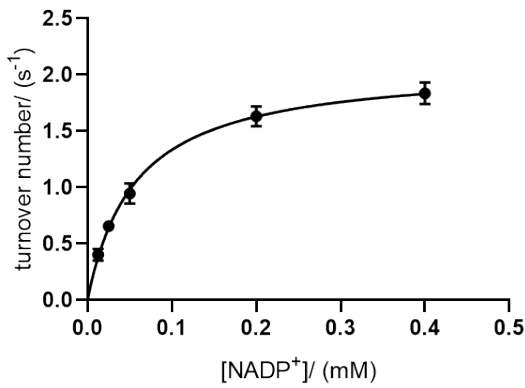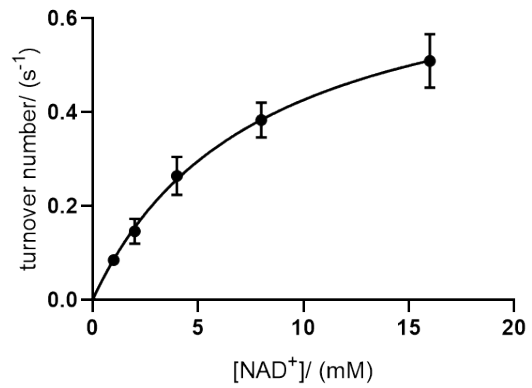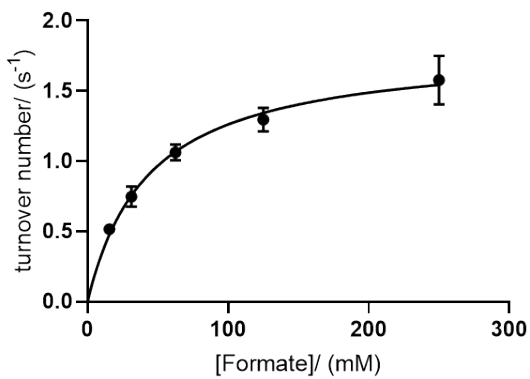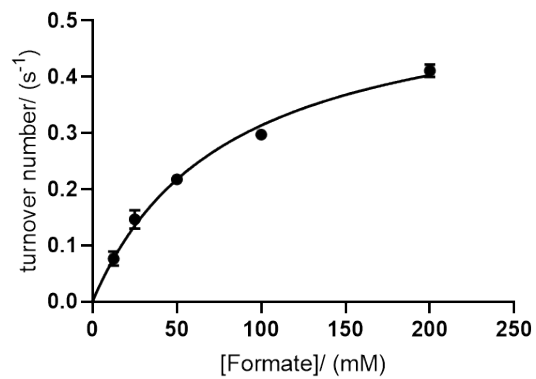

V9-GQAKC (A198G/D221Q/C255A/H379K/S380V)

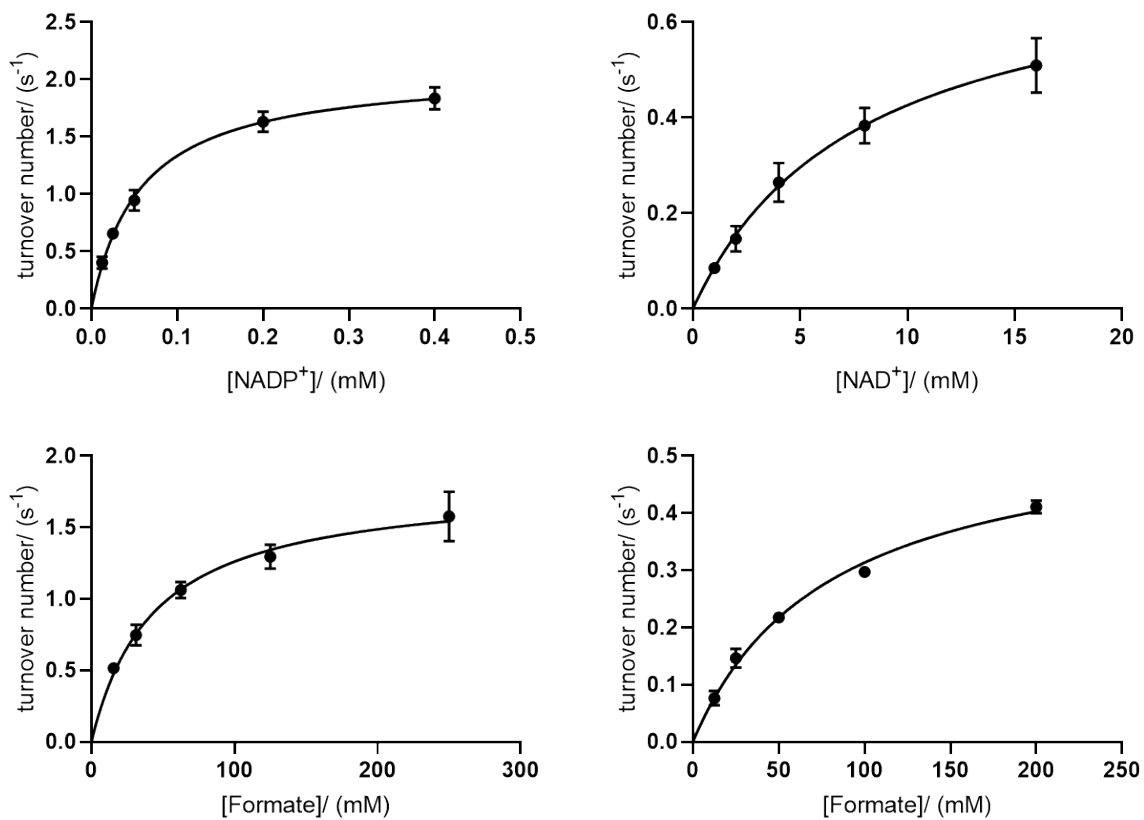

Figure S17. Michaelis Menten curves for deconvoluted PseFDH variants.

**Table S1.** Kinetic parameters of NADP<sup>+</sup>-dependent FDHs previously reported.

| Variant                                                 | Substrate            | K <sub>M</sub><br>(mM) | k <sub>cat</sub><br>(s <sup>-1</sup> ) | k <sub>cat</sub> /K <sub>M</sub><br>(mM <sup>-1</sup> s <sup>-1</sup> ) | CSR <sup>c</sup> | RCE <sup>d,e</sup> | Ref. |
|---------------------------------------------------------|----------------------|------------------------|----------------------------------------|-------------------------------------------------------------------------|------------------|--------------------|------|
| <i>MvaFDH</i> 3M<br>C145S/<br>D221Q/<br>C255V           | NAD <sup>+</sup>     | 1.09 ± 0.04            | 8.22 ± 0.10                            | 7.54                                                                    | 1.14             | 0.104              | 6    |
|                                                         | Formate <sup>a</sup> | nd                     | nd                                     | nd                                                                      |                  |                    |      |
|                                                         | NADP <sup>+</sup>    | 0.92 ± 0.10            | 7.89 ± 1.26                            | 8.58                                                                    |                  |                    |      |
|                                                         | Formate <sup>b</sup> | 113 ± 11               | nd                                     | nd                                                                      |                  |                    |      |
| <i>MvaFDH</i> 4M<br>C145S/<br>A198G/<br>D221Q/<br>C255V | NAD <sup>+</sup>     | 4.10 ± 0.17            | 5.18 ± 0.09                            | 1.26                                                                    | 16.7             | 0.256              | 6    |
|                                                         | Formate <sup>a</sup> | nd                     | nd                                     | nd                                                                      |                  |                    |      |
|                                                         | NADP <sup>+</sup>    | 0.147 ± 0.020          | 3.08 ± 0.10                            | 21.0                                                                    |                  |                    |      |
|                                                         | Formate <sup>b</sup> | 98 ± 13                | nd                                     | nd                                                                      |                  |                    |      |
| <i>PseFDH</i><br>D221S                                  | NAD <sup>+</sup>     | 0.71 ± 45              | 5.0 ± 0.3                              | 7.04                                                                    | 1.26             | 0.062              | 7    |
|                                                         | Formate <sup>a</sup> | 32 ± 2                 | nd                                     | nd                                                                      |                  |                    |      |
|                                                         | NADP <sup>+</sup>    | 0.19 ± 30              | 1.7 ± 0.2                              | 8.9                                                                     |                  |                    |      |
|                                                         | Formate <sup>b</sup> | 43                     | nd                                     | nd                                                                      |                  |                    |      |
| <i>PseFDH</i><br>D221S/<br>A198G                        | NAD <sup>+</sup>     | 0.54 ± 42              | 5.0 ± 0.2                              | 9.26                                                                    | 0.79             | 0.045              | 7    |
|                                                         | Formate <sup>a</sup> | 53 ± 1                 | nd                                     | nd                                                                      |                  |                    |      |
|                                                         | NADP <sup>+</sup>    | 0.28 ± 25              | 1.8 ± 0.2                              | 6.43                                                                    |                  |                    |      |
|                                                         | Formate <sup>b</sup> | 89                     | nd                                     | nd                                                                      |                  |                    |      |
| <i>BstFDH</i> WT                                        | NAD <sup>+</sup>     | 1.43                   | 1.66                                   | 1.16                                                                    | 25.9             | -                  | 8    |
|                                                         | Formate <sup>a</sup> | > 150                  | nd                                     | nd                                                                      |                  |                    |      |
|                                                         | NADP <sup>+</sup>    | 0.16                   | 4.75                                   | 30                                                                      |                  |                    |      |
|                                                         | Formate <sup>b</sup> | 55.5                   | nd                                     | nd                                                                      |                  |                    |      |
| <i>PseFDH</i><br>D221Q/<br>H223N                        | NAD <sup>+</sup>     | 1.0 ± 0.6              | nd                                     | 299 ± 13                                                                | 9.6              | 0.218              | 9    |
|                                                         | Formate <sup>a</sup> | nd                     | nd                                     | nd                                                                      |                  |                    |      |
|                                                         | NADP <sup>+</sup>    | 0.35 ± 0.01            | nd                                     | 31.0 ± 3.9                                                              |                  |                    |      |
|                                                         | Formate <sup>b</sup> | 63 ± 3                 | nd                                     | nd                                                                      |                  |                    |      |

Parameters for formate measured in the presence of (a) NAD<sup>+</sup> or (b) NADP<sup>+</sup>. (c) Cofactor Specificity Ratio is calculated with equation  $\frac{(k_{cat}/K_M)_{NADP - mutant}}{(k_{cat}/K_M)_{NAD - mutant}}$ . (d) Relative Catalytic Efficiency is calculated with equation  $\frac{(k_{cat}/K_M)_{NADP - mutant}}{(k_{cat}/K_M)_{NAD - WT}}$ . (e) RCE values calculated with the k<sub>cat</sub>/K<sub>M</sub> values of *MvaFDH* WT for NAD<sup>+</sup> (82 mM<sup>-1</sup> s<sup>-1</sup>) cited in Ref. <sup>6</sup> or of *PseFDH* WT for NAD<sup>+</sup> (142 mM<sup>-1</sup> s<sup>-1</sup>) reported in Ref. <sup>7</sup>.



**Table S2.** Kinetics of PseFDH variants.

| Variant | Substrate            | $K_M$<br>(mM) | $k_{cat}$<br>(s <sup>-1</sup> ) | $k_{cat}/K_M$<br>(mM <sup>-1</sup> s <sup>-1</sup> ) | CSR <sup>c</sup> | RCE <sup>d,e</sup> |
|---------|----------------------|---------------|---------------------------------|------------------------------------------------------|------------------|--------------------|
| WT      | NAD <sup>+</sup>     | 0.053 ± 0.004 | 7.5 ± 0.2                       | 142.07                                               | -                | -                  |
|         | Formate <sup>a</sup> | 7.6 ± 1.1     | 7.8 ± 0.3                       | 1.02                                                 |                  |                    |
|         | NADP <sup>+</sup>    | ND            | ND                              | -                                                    |                  |                    |
|         | Formate <sup>b</sup> | ND            | ND                              | -                                                    |                  |                    |
| V1      | NAD <sup>+</sup>     | 6.4 ± 0.8     | 1.8 ± 0.1                       | 0.28                                                 | 93               | 0.183              |
|         | Formate <sup>a</sup> | 140 ± 33      | 1.6 ± 0.2                       | 0.011                                                |                  |                    |
|         | NADP <sup>+</sup>    | 0.127 ± 0.01  | 3.3 ± 0.1                       | 26.0                                                 |                  |                    |
|         | Formate <sup>b</sup> | 30.3 ± 0.1    | 2.9 ± 0.1                       | 0.096                                                |                  |                    |
| V3      | NAD <sup>+</sup>     | 4.2 ± 0.5     | 1.4 ± 0.1                       | 0.32                                                 | 180              | 0.407              |
|         | Formate <sup>a</sup> | 110 ± 16      | 1.2 ± 0.1                       | 0.011                                                |                  |                    |
|         | NADP <sup>+</sup>    | 0.056 ± 0.004 | 3.24 ± 0.05                     | 57.85                                                |                  |                    |
|         | Formate <sup>b</sup> | 31 ± 3        | 3.5 ± 0.1                       | 0.11                                                 |                  |                    |
| V7      | NAD <sup>+</sup>     | 8.3 ± 0.8     | 1.1 ± 0.1                       | 0.13                                                 | 281              | 0.257              |
|         | Formate <sup>a</sup> | 162 ± 16      | 0.88 ± 0.2                      | 0.005                                                |                  |                    |
|         | NADP <sup>+</sup>    | 0.08 ± 0.01   | 3.0 ± 0.1                       | 36.62                                                |                  |                    |
|         | Formate <sup>b</sup> | 23 ± 3        | 3.1 ± 0.1                       | 0.137                                                |                  |                    |
| V9      | NAD <sup>+</sup>     | 5.4 ± 0.7     | 1.5 ± 0.1                       | 0.28                                                 | 510              | 1.0                |
|         | Formate <sup>a</sup> | 185 ± 34      | 1.64 ± 0.01                     | 0.009                                                |                  |                    |
|         | NADP <sup>+</sup>    | 0.026 ± 0.001 | 3.69 ± 0.03                     | 141.92                                               |                  |                    |
|         | Formate <sup>b</sup> | 24 ± 2.4      | 3.6 ± 0.1                       | 0.16                                                 |                  |                    |
| V13     | NAD <sup>+</sup>     | 9.02 ± 0.01   | 1.5 ± 0.1                       | 0.17                                                 | 281              | 0.337              |
|         | Formate <sup>a</sup> | 89 ± 6        | 1.40 ± 0.03                     | 0.016                                                |                  |                    |
|         | NADP <sup>+</sup>    | 0.12 ± 0.01   | 5.6 ± 0.1                       | 47.90                                                |                  |                    |
|         | Formate <sup>b</sup> | 22 ± 2        | 5.6 ± 0.1                       | 0.25                                                 |                  |                    |
| V14     | NAD <sup>+</sup>     | 8 ± 1         | 1.09 ± 0.06                     | 0.13                                                 | 536              | 0.507              |
|         | Formate <sup>a</sup> | 96 ± 14       | 1.16 ± 0.05                     | 0.012                                                |                  |                    |
|         | NADP <sup>+</sup>    | 0.049 ± 0.006 | 3.6 ± 0.1                       | 72.01                                                |                  |                    |
|         | Formate <sup>b</sup> | 42 ± 6        | 3.5 ± 0.1                       | 0.08                                                 |                  |                    |
| V19     | NAD <sup>+</sup>     | 6 ± 1         | 2.57 ± 0.09                     | 0.45                                                 | 71               | 0.226              |
|         | Formate <sup>a</sup> | 84 ± 7        | 2.63 ± 0.06                     | 0.03                                                 |                  |                    |
|         | NADP <sup>+</sup>    | 0.13 ± 0.01   | 4.31 ± 0.09                     | 32.16                                                |                  |                    |
|         | Formate <sup>b</sup> | 16 ± 1        | 4.84 ± 0.08                     | 0.29                                                 |                  |                    |

Parameters for formate measured in the presence of (a) NAD<sup>+</sup> or (b) NADP<sup>+</sup>. (c) Cofactor Specificity Ratio is calculated with equation  $\frac{(k_{cat}/K_M)_{NADP - mutant}}{(k_{cat}/K_M)_{NAD - mutant}}$ . (d) Relative Catalytic Efficiency is calculated with equation  $\frac{(k_{cat}/K_M)_{NADP - mutant}}{(k_{cat}/K_M)_{NAD - WT}}$ . (e) RCE values calculated with the  $k_{cat}/K_M$  value of PseFDH WT for NAD<sup>+</sup> (142 mM<sup>-1</sup> s<sup>-1</sup>) reported in Ref. 7.

**Table S3.** Kinetics of PseFDH V9 deconvoluted variants.

| Variant                                                    | Substrate            | $K_M$<br>(mM) | $k_{cat}$<br>(s <sup>-1</sup> ) | $k_{cat}/K_M$<br>(mM <sup>-1</sup> s <sup>-1</sup> ) | CSR <sup>c</sup> | RCE <sup>d,e</sup> |
|------------------------------------------------------------|----------------------|---------------|---------------------------------|------------------------------------------------------|------------------|--------------------|
| <b>G</b><br>(A198G)                                        | NAD <sup>+</sup>     | 0.035 ± 0.002 | 6.5 ± 0.1                       | 185                                                  | -                | -                  |
|                                                            | Formate <sup>a</sup> | 8.63 ± 0.99   | 6.4 ± 0.2                       | 0.74                                                 |                  |                    |
|                                                            | NADP <sup>+</sup>    | ND            | ND                              | -                                                    |                  |                    |
|                                                            | Formate <sup>b</sup> | ND            | ND                              | -                                                    |                  |                    |
| <b>GQ</b><br>(A198G/<br>D221Q)                             | NAD <sup>+</sup>     | 1.3 ± 0.4     | 1.2 ± 0.1                       | 1                                                    | 45               | 0.316              |
|                                                            | Formate <sup>a</sup> | 117 ± 27      | 1.24 ± 0.07                     | 0.01                                                 |                  |                    |
|                                                            | NADP <sup>+</sup>    | 0.067 ± 0.009 | 3.0 ± 0.1                       | 45                                                   |                  |                    |
|                                                            | Formate <sup>b</sup> | 281 ± 50      | 2.7 ± 0.2                       | 0.009                                                |                  |                    |
| <b>GQA</b><br>(A198G/<br>D221Q/<br>C255A)                  | NAD <sup>+</sup>     | 4.6 ± 0.7     | 1.42 ± 0.08                     | 0.3                                                  | 57               | 0.119              |
|                                                            | Formate <sup>a</sup> | 66 ± 10       | 1.38 ± 0.09                     | 0.02                                                 |                  |                    |
|                                                            | NADP <sup>+</sup>    | 0.12 ± 0.02   | 2.0 ± 0.1                       | 17                                                   |                  |                    |
|                                                            | Formate <sup>b</sup> | 53 ± 6        | 1.83 ± 0.04                     | 0.03                                                 |                  |                    |
| <b>GQK</b><br>(A198G/<br>D221Q/<br>H379K)                  | NAD <sup>+</sup>     | 1.23 ± 0.25   | 2.16 ± 0.14                     | 1.8                                                  | 17               | 0.211              |
|                                                            | Formate <sup>a</sup> | 63 ± 11       | 2.15 ± 0.11                     | 0.03                                                 |                  |                    |
|                                                            | NADP <sup>+</sup>    | 0.141 ± 0.015 | 4.2 ± 0.1                       | 30                                                   |                  |                    |
|                                                            | Formate <sup>b</sup> | 116 ± 20      | 4.0 ± 0.1                       | 0.03                                                 |                  |                    |
| <b>GQV</b><br>(A198G/<br>D221Q/<br>S380V)                  | NAD <sup>+</sup>     | 1.5 ± 0.4     | 1.1 ± 0.1                       | 0.7                                                  | 62               | 0.302              |
|                                                            | Formate <sup>a</sup> | 84 ± 26       | 0.85 ± 0.09                     | 0.01                                                 |                  |                    |
|                                                            | NADP <sup>+</sup>    | 0.053 ± 0.008 | 2.3 ± 0.1                       | 43                                                   |                  |                    |
|                                                            | Formate <sup>b</sup> | 150 ± 29      | 2.2 ± 0.1                       | 0.014                                                |                  |                    |
| <b>GQAV</b><br>(A198G/D221Q/<br>C255A/S380V)               | NAD <sup>+</sup>     | 7.8 ± 1.4     | 0.76 ± 0.07                     | 0.1                                                  | 370              | 0.260              |
|                                                            | Formate <sup>a</sup> | 80 ± 7        | 0.56 ± 0.02                     | 0.007                                                |                  |                    |
|                                                            | NADP <sup>+</sup>    | 0.057 ± 0.004 | 2.09 ± 0.05                     | 37                                                   |                  |                    |
|                                                            | Formate <sup>b</sup> | 44 ± 6        | 1.81 ± 0.08                     | 0.04                                                 |                  |                    |
| <b>GQKV</b><br>(A198G/D221Q/<br>H379K/S380V)               | NAD <sup>+</sup>     | 4.2 ± 0.4     | 1.69 ± 0.08                     | 0.4                                                  | 250              | 0.704              |
|                                                            | Formate <sup>a</sup> | 94 ± 10       | 1.10 ± 0.03                     | 0.01                                                 |                  |                    |
|                                                            | NADP <sup>+</sup>    | 0.036 ± 0.006 | 3.6 ± 0.2                       | 100                                                  |                  |                    |
|                                                            | Formate <sup>b</sup> | 40 ± 5        | 3.3 ± 0.1                       | 0.08                                                 |                  |                    |
| <b>V9-GQAKC</b><br>(A198G/D221Q/<br>C255A/H379K/<br>S380V) | NAD <sup>+</sup>     | 5.4 ± 0.7     | 1.5 ± 0.1                       | 0.3                                                  | 510              | 1.0                |
|                                                            | Formate <sup>a</sup> | 185 ± 34      | 1.64 ± 0.01                     | 0.009                                                |                  |                    |
|                                                            | NADP <sup>+</sup>    | 0.026 ± 0.001 | 3.69 ± 0.03                     | 141.92                                               |                  |                    |
|                                                            | Formate <sup>b</sup> | 42 ± 6        | 3.5 ± 0.1                       | 0.16                                                 |                  |                    |

Parameters for formate measured in the presence of (a) NAD<sup>+</sup> or (b) NADP<sup>+</sup>. (c) Cofactor Specificity

Ratio is calculated with equation  $\frac{(k_{cat}/K_M)_{NADP - mutant}}{(k_{cat}/K_M)_{NAD - mutant}}$ . (d) Relative Catalytic Efficiency is calculated

with equation  $\frac{(k_{cat}/K_M)_{NADP - mutant}}{(k_{cat}/K_M)_{NAD - WT}}$ . (e) RCE values calculated with the  $k_{cat}/K_M$  value of PseFDH WT for

NAD<sup>+</sup> (142 mM<sup>-1</sup> s<sup>-1</sup>) reported in Ref. <sup>7</sup>.

**Table S4.** Designed oligos by DNAworks to construct the 685 bp fragment for the combinatorial library.

| Name | Sequence (5' - 3')                                         |
|------|------------------------------------------------------------|
| O1   | CTGGTTCGTAACCTACCTGCCGTCTCACGAATGGGCTCGTAAAGGTGGTTG        |
| O2   | GCTTACGCAGTCAGCTATGTTCCAACCACCTTTACGAGCCCA                 |
| O3   | GAACATAGCTGACTGCGTAAGCCACGCTTACGACCTGGAAGC                 |
| O4   | CAACGGTACCAACGTGCATAGCTTCCAGGTCGTAAGCGTG                   |
| O5   | TATGCACGTTGGTACCGTTGGTGCTGGTTCGTATCGGTCTG                  |
| O6   | CCAGACGACGCAGAACAGCCAGACCGATACGACCAGCAC                    |
| O7   | GCTGTTCTGCGTCGTCTGGCTCCGTTTCGACGTTACCT                     |
| O8   | <b>MNN</b> ACGM <b>NN</b> GGTGTAGTGCAGGTGAACGTCGAACGGAG    |
| O9   | GCACTACAC <b>CCNNK</b> CGT <b>NNK</b> CGTCTGCCGGAATCTGTTGA |
| O10  | CCAGGTCAGGTTTCAGTTCTTTTTCAACAGATTCCGGCAGACG                |
| O11  | AAAAGA <b>ACT</b> GAACCTGACCTGGCAGCTACCCGTGAAGACAT         |
| O12  | ACGTCGCAAACCGGGTACATGTCTTACGGGTAGCGTG                      |
| O13  | GTACCCGGTTTGCAGCGTTGTTACCCTGAAC <b>DBW</b> CCG             |
| O14  | TTCGGTTTCCGGGTGCAGCGGT <b>WVH</b> TTTCAGGGTAACA            |
| O15  | CTGCACCCGGAAACCGAACACATGATCAACGACGAAACCC                   |
| O16  | GCACCACGTTTGAACAGTTTCAGGGTTTCGTCGTTGATCATGTG               |
| O17  | TGAAACTGTTCAAACGTGGTGCTTACATCGTTAACACCGCTCG                |
| O18  | ACGGTCGCACAGTTTACCACGAGCGGTGTTAACGATGTAA                   |
| O19  | TGGTAAACTGTGCGACCGTGACGCTGTTGCTCGTGCT                      |
| O20  | GCCAGACGACCAGATTCCAGAGCACGAGCAACAGCGTC                     |
| O21  | CTGGAATCTGGTCGTCTGGCTGGTTATGCGGGTGACGTG                    |
| O22  | CCGGCTGGGGGAACACACGTACCCGCATAACCA                          |
| O23  | TGGTTCCCCAGCCGGCTCCGAAAGACCACCCGTG                         |
| O24  | GTTGTACGGCATGGTACGCCACGGGTGGTCTTTTCGGAG                    |
| O25  | GCGTACCATGCCGTACAACGGTATGACCCCGCACATCTC                    |
| O26  | GCGGTCAGGGTGGTACCAGAGATGTGCGGGGTCATACC                     |
| O27  | TGGTACCACCCTGACCGCTCAGGCTCGTTACGCTGC                       |
| O28  | CCAGGATTTACGGGTACCAGCAGCGTAACGAGCCTGA                      |
| O29  | TGGTACCCGTGAAATCCTGGAATGCTTCTTCGAAGGTCGTCC                 |
| O30  | GATCAGGTATTCGTCACGGATCGGACGACCTTCGAAGAAGCATT               |
| O31  | GATCCGTGACGAATACCTGATCGTTCAGGGTGGTGCTCTGG                  |
| O32  | <b>AVYMNN</b> AGCACCGGTACCAGCCAGAGCACACCCTGAAC             |
| O33  | CTGGTACCGGTGCT <b>NNKRBT</b> TACTCTAAAGGTAACGCTACCGG       |
| O34  | AATTTAGCAGCTTCTTCAGAACCACCGGTAGCGTTACCTTTAGAGTAA           |
| O35  | TGGTTCTGAAGAAGCTGCTAAATTCAAAAAGCTGTTTAAGCTAGCGC            |
| O36  | GTCGACATACTCGAGCGGCCGCGCTAGCTTAAACAGCTTTTTTTG              |

For oligos 8, 9, 13, 14, 32 and 33 the original bases provided by the server were exchanged by degenerate codons NNK/MNN, DBW/WVH or RBT/AVY.

**Table S5.** Oligos designed for PseFDH specific mutations.

| <b>Name</b>    | <b>Sequence (5' - 3')</b>                  |
|----------------|--------------------------------------------|
| A198G_Fw       | GCTATGCACGTTGGTACCGTT <b>GGT</b> GCTGGTCGT |
| A198G_Rv       | CAGACCGATACGACCAGCACCA <b>CGG</b> TACC     |
| D221Q_Fw       | CTGCACTACACCCAGCGTCAC <b>GTCT</b> GCCG     |
| D221Q_Rv       | ACGGTGACG <b>CTG</b> GGTGTAGTGCAGGTGAACGTC |
| C255A_Fw       | GTTGTTACCCTGAAC <b>GCA</b> CCGCTGCACCCG    |
| C255A_Rv       | GTGCAGCGGTG <b>CGT</b> TCAGGGTAACAACGTC    |
| H379K_Fw       | GTACCGGTGCT <b>AAG</b> TCTTACTCTAAAGGTAAC  |
| H379K_Rv       | GCGTTACCTTTAGAGTCT <b>ACC</b> TTAGCACCGGT  |
| H379K/S380V_Fw | GTACCGGTGCT <b>AAGGTT</b> ACTCTAAAGGTAAC   |
| H379K/S380V_Rv | GCGTTACCTTTAGAG <b>TAAACC</b> TTAGCACCGGT  |

The underlined and bold bases represent the codons modified for specific mutations.

## 2. Protocols

### Computational models

The computational models used in this study were built using the apo state X-ray crystal structure (Protein Data Bank (PDB) accession number 2GO1) and the holo state X-ray crystal structure (PDB accession number 2GUG crystallized in the presence of formate in the active site) as a starting point to run MD simulations:

- 2GO1: NAD-dependent formate dehydrogenase from *Pseudomonas sp. 101* (APO form). (2.10 Å resolution).
- 2GUG: NAD-dependent formate dehydrogenase from *Pseudomonas sp.101* in complex with formate; *Pseudomonas sp. 101* (holo, formate is present, cofactor is not). (2.28 Å resolution)

In these X-Ray structures, the region near the cofactor (residues 257-262) and the loop C-terminus (375-400) was unsolved. These unsolved regions in 2GUG were reconstructed using 2NAD as the reference structure of structure, and a complete PseFDH model (400 residue length) was built as described in the Methods section of the manuscript. NAD<sup>+</sup> and NADP<sup>+</sup> cofactors were placed in the active site of holo (presence of formate) PDB 2GUG by structural alignment with PDB 2NAD (that contains NAD<sup>+</sup> cofactor).

- 2NAD: HIGH RESOLUTION STRUCTURES OF HOLO AND APO FORMATE DEHYDROGENASE, presence of NAD cofactor and azide ion; *Pseudomonas sp. 101*. (2.05 Å resolution)

The structure used as a reference (2NAD) was crystallized in the ternary complex (FDH-NAD--azide), which can be considered as an analog of the transition state in the closed conformation<sup>3</sup>, this can be confirmed by RMSD value (shown in Figure S14.b and c). Related FDH with solved structure available from the PDB Bank:

- 2GSD<sup>5</sup>: NAD-dependent formate dehydrogenase from bacterium *Moraxella sp. C2* in complex with NAD and azide. (1-399 residues, 1.95 Å resolution).

As shown in Figure S15 and the computed RMSD values, the reconstructed regions (Figure S15.b, shown in orange) adopt a similar conformation that in the holo-MorFDH structure. The extra 7 residues in the C-terminal region present in the computational model that were built with homology modeling tools are shown in Figure S15.c (393-400, shown in orange). By comparing the structure of holo-MorFDH (PDB:2GSD) with the starting point for MD simulations (shown in green in Figure S15), it can be seen that the additional residues built in the model are in a very similar conformation than in the holo-MorFDH structure 2GSD. The latter structure is described to be in a closed conformation due to the presence of the cofactor and azide. The small RMSD (0.281 Å) obtained when comparing 2GSD structure and the generated computational model is indicating that the model correctly describes the major closed conformation of the holo-protein system and is thus a good starting point for running the MD simulations.

## QuikChange protocol

### Reaction mix

|                        |              |                 |
|------------------------|--------------|-----------------|
| H <sub>2</sub> O       | add to 50 µl |                 |
| 5X Phusion GC buffer   | 10 µl        |                 |
| 10 mM dNTPs            | 1 µl         |                 |
| Forward primer         | 2.5 µl       |                 |
| Reverse primer         | 2.5 µl       |                 |
| Template DNA           |              | 50 ng (1-10 µl) |
| Phusion DNA Polymerase | 0.5 µl       |                 |
| Final volume           | 50 µl        |                 |

### PCR Programm

| Cycle step           | Temperature | Time              | Cycles |
|----------------------|-------------|-------------------|--------|
| Initial Denaturation | 98 °C       | 30 s              | 1      |
| Denaturation         | 98 °C       | 10 s              | 30     |
| Annealing            | 55 / 60 °C  | 30 s              | 30     |
| Extension            | 72 °C       | 2 min (15-30s/kb) | 30     |
| Final Extension      | 72 °C       | 10 min            | 1      |
|                      | 4 °C        | hold              | 1      |

- 1.- Run 5 µl of the PCR product and the negative control (see a band around 4.5 kbp and no band for the negative control).
- 2.- Add 1µl of DpnI restriction enzyme to the PCR product, incubate at 37 °C overnight.
- 3.- Purify PCR product

### ADO fragment synthesis

- 1.- Dilute each primer to 10 µM in water
- 2.- In a new tube, mix 1µl of each primer

**First ADO step:** Without flanking primers.

### Reaction Mix:

- 4 µl of the equimolar mixture
- 5 µl r of buffer High GC (phusion kit) it has MgCl<sub>2</sub>
- 5 µl of 2mM dNTPs
- 1 µl of Phusion polymerase
- 35 µl ddH<sub>2</sub>O
- 50 µl Final volume

**PCR Program:**

| Cycle step   | Temperature (°C) | Time | Cycles |
|--------------|------------------|------|--------|
| Denaturation | 95°C             | 20s  | 20     |
| Annealing    | 50°C             | 30s  |        |
| Extension    | 70°C             | 1min |        |
| Hold         | 4°C              |      |        |

**Second ADO step:** With flanking primers.

**Reaction Mix:**

1 µl of resulting assembly reaction  
 5 µl of buffer High GC (phusion kit) it has MgCl<sub>2</sub>  
 5 µl of 2mM dNTPs  
 1 µl Primer 1  
 1 µl Primer 36  
 1 µl of Phusion polymerase  
 36 µl ddH<sub>2</sub>O  
 50 µl Final volume

**PCR Program:**

| Cycle step           | Temperature (°C) | Time  | Cycles |
|----------------------|------------------|-------|--------|
| Initial Denaturation | 95               | 2 min | 1      |
| Denaturation         | 95               | 20 s  | 25     |
| Annealing            | 50               | 30 s  |        |
| Extension            | 70               | 1 min |        |
| Final extension      | 70               | 5 min | 1      |
| Hold                 | 4                |       |        |

### 3. References

- (1) Filippova, E. V.; Polyakov, K. M.; Tikhonova, T. V.; Stekhanova, T. N.; Boiko, K. M.; Popov, V. O. Structure of a New Crystal Modification of the Bacterial NAD-Dependent Formate Dehydrogenase with a Resolution of 2.1 Å. *Crystallogr. Rep.* **2005**, *50*, 796-800. <https://doi.org/10.1134/1.2049398>.
- (2) Filippova, E. V.; Polyakov, K. M.; Tikhonova, T. V.; Stekhanova, T. N.; Boiko, K. M.; Sadykhov, I. G.; Tishkov, V. I.; Popov, V. O.; Labru, N. Crystal Structures of Complexes of NAD<sup>+</sup>-Dependent Formate Dehydrogenase from Methylophilic Bacterium *Pseudomonas* Sp. 101 with Formate. *Crystallogr. Rep.* **2006**, *51*, 627-631. <https://doi.org/10.1134/S1063774506040146>.
- (3) Lamzin, V. S.; Dauter, Z.; Popov, V. O.; Harutyunyan, E. H.; Wilson, K. S. High Resolution Structures of Holo and Apo Formate Dehydrogenase. *J Mol Biol.* **1994**, *263* (3), 759-785. <https://doi.org/10.1006/jmbi.1994.1188>.
- (4) K. B. Cahn, J.; A. Werlang, C.; Baumschlager, A.; Brinkmann-Chen, S.; L. Mayo, S.; H. Arnold, F. A General Tool for Engineering the NAD/NADP Cofactor Preference of Oxidoreductases. *ACS Synth. Biol.* **2016**, *6* (2), 326-333. <https://doi.org/10.1021/acssynbio.6b00188>.
- (5) Shabalina, I. G.; Filippova, E. V.; Polyakov, K. M.; Sadykhov, E. G.; Safonova, T. N.; Tikhonova, T. V.; Tishkov, V. I.; Popov, V. O. Structures of the Apo and Holo Forms of Formate Dehydrogenase from the Bacterium *Moraxella* Sp. C-1: Towards Understanding the Mechanism of the Closure of the Interdomain Cleft. *Acta Crystallogr D Biol Crystallogr.* **2009**, *65*, 1315-1325. <https://doi.org/10.1107/S0907444909040773>.
- (6) Hoelsch, K.; Sührer, I.; Heusel, M.; Weuster-botz, D. Engineering of Formate Dehydrogenase : Synergistic Effect of Mutations Affecting Cofactor Specificity and Chemical Stability. *App Microbial Biotechnol.* **2013**, *97* (6), 2473-2481. <https://doi.org/10.1007/s00253-012-4142-9>.
- (7) Alekseeva, A. A.; Fedorchuk, V. V.; Zarubina, S. A.; Sadykhov, E. G.; Matorin, A. D.; Savin, S. S.; Tishkov, V. I. The Role of Ala198 in the Stability and Coenzyme Specificity of Bacterial Formate Dehydrogenases. *Acta Naturae* **2015**, *7* (1), 60-69. <https://doi.org/10.32607/20758251-2015-7-1-60-69>.
- (8) Hatrongjit, R.; Packdibamrung, K. Enzyme and Microbial Technology A Novel NADP<sup>+</sup>-Dependent Formate Dehydrogenase from *Burkholderia Stabilis* 15516 : Screening , Purification and Characterization. *Enzyme Microb. Technol.* **2010**, *46* (7), 557-561. <https://doi.org/10.1016/j.enzmictec.2010.03.002>.
- (9) Ihara, M.; Kawano, Y.; Urano, M.; Okabe, A. Light Driven CO<sub>2</sub> Fixation by Using Cyanobacterial Photosystem I and NADPH-Dependent Formate Dehydrogenase. **2013**, *8* (8), 1-8. <https://doi.org/10.1371/journal.pone.0071581>.
